# Supplementary material for: Atmospheric mercury uptake and accumulation in forests dependent on climatic factors
Source: Royal Society of Chemistry journal article supplement (doi:10.1039/d3em00454f), 2024-01-01
Supplement: d3em00454f2.pdf [file d3em00454f2.pdf]

1 *Supporting information*

2  
3 **Atmospheric mercury uptake and accumulation in forests dependent on**  
4 **climatic factors**

5  
6 Yo Han Yang<sup>a</sup>, Min-Seob Kim<sup>b</sup>, Jaeseon Park<sup>b</sup>, Sae Yun Kwon<sup>a\*</sup>

7  
8 <sup>a</sup>Division of Environmental Science and Engineering, Pohang University of Science and  
9 Technology, 77 Cheongam-Ro, Nam-Gu, Pohang 37673, South Korea

10 <sup>b</sup>Environmental Measurement & Analysis Center, National Institute of Environmental Research,  
11 42 Hwangyong-Ro, Seo-Gu, Incheon 22689, South Korea

12  
13 \* Corresponding author: Sae Yun Kwon

14 Phone: +82-54-279-2290

15 Fax: +82-54-279-8299

16 Email: [saeyunk@postech.ac.kr](mailto:saeyunk@postech.ac.kr)

17  
18  
19  
20  
21  
22  
23  
24  
25  
26  
27

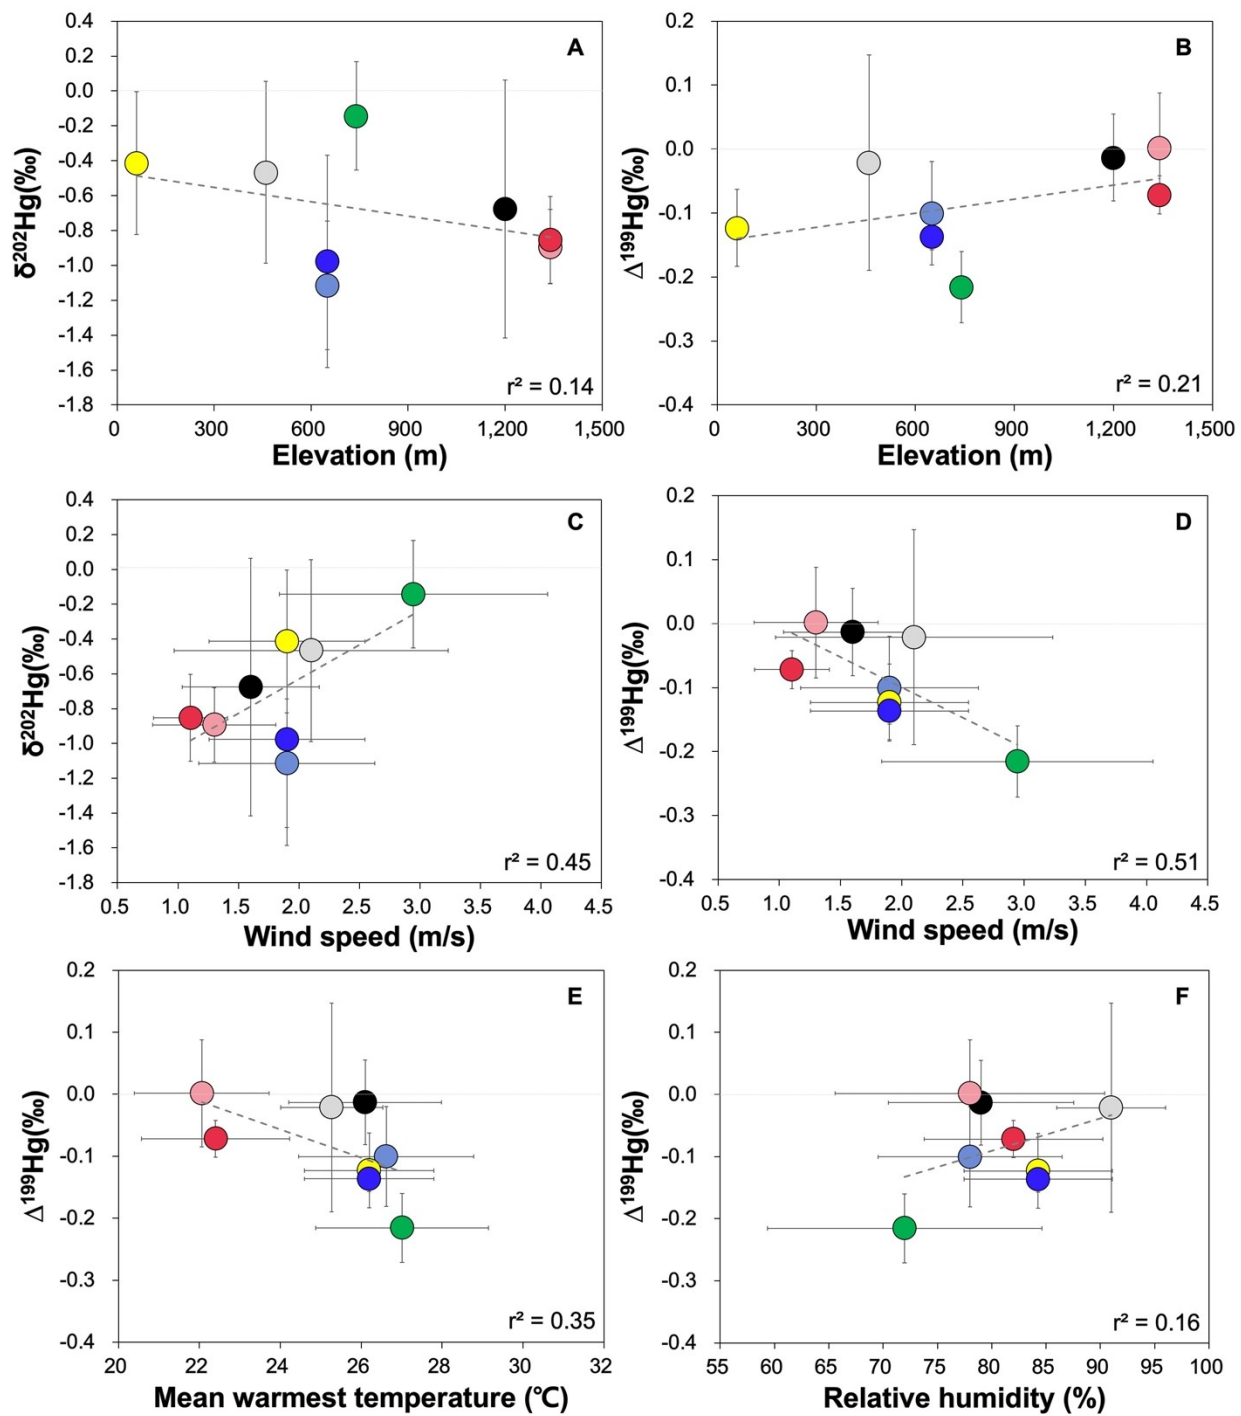

28

29 Figure S1. Site-specific average  $\delta^{202}\text{Hg}$  values of TGM in relation to elevation (A) and wind speed  
 30 (C). Site-specific average  $\Delta^{199}\text{Hg}$  values of TGM in relation to elevation (B), wind speed (D), mean  
 31 warmest temperature (E), and relative humidity (F).

32

33

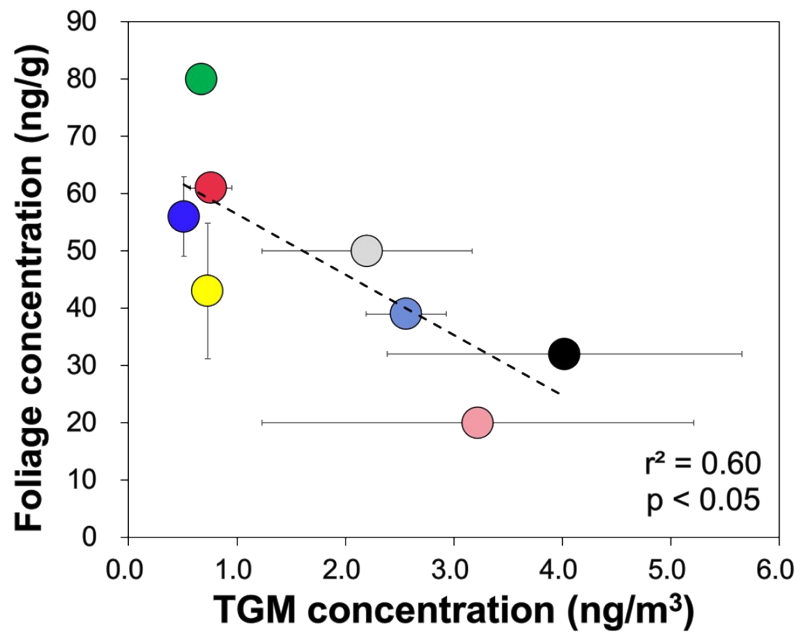

34

35 Figure S2. Site-specific average foliage THg concentration in relation to TGM concentration. The  
36 colors represent individual mountain site and are consistent with Figure 2.

37

38

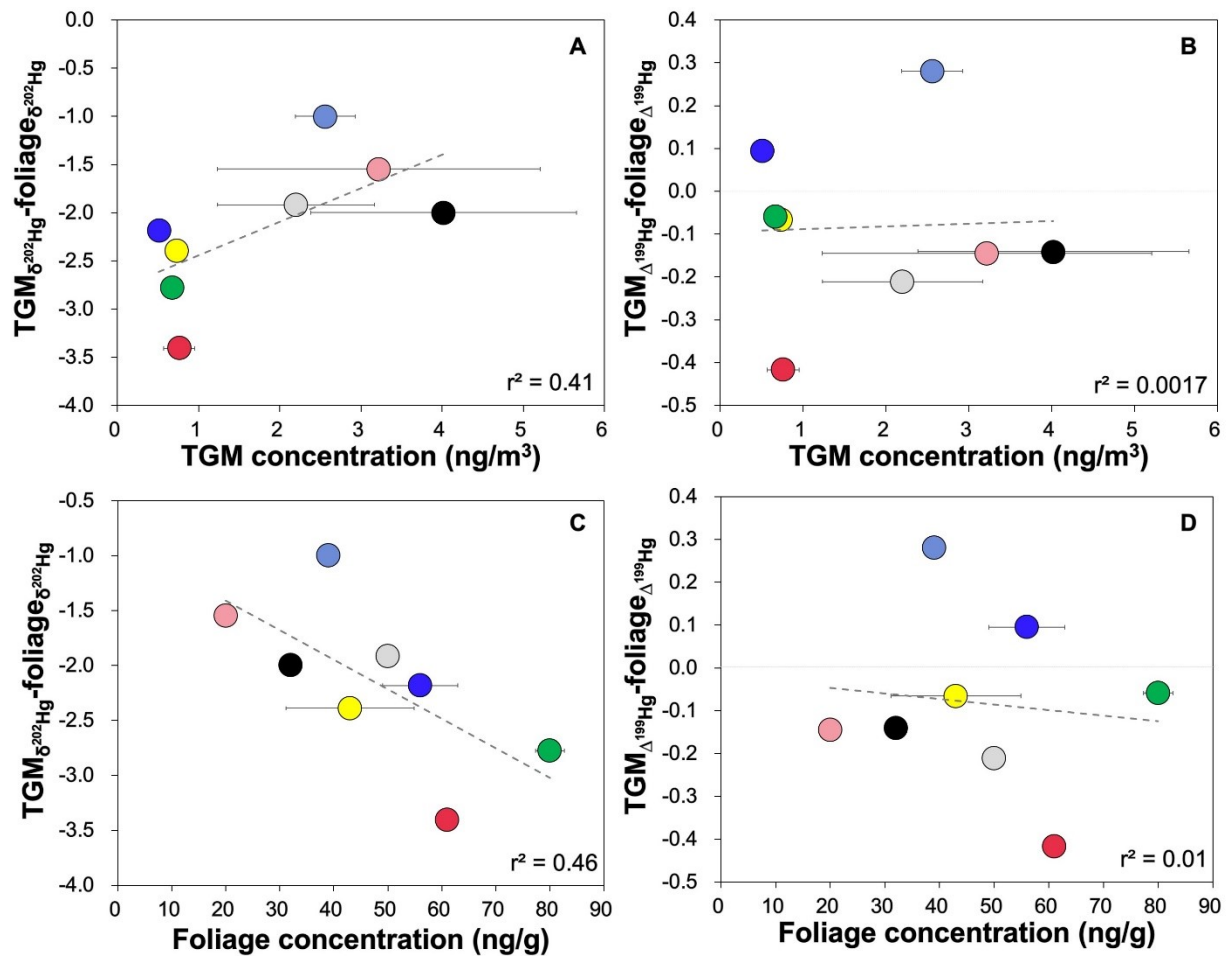

39

40 Figure S3. Site-specific average TGM concentration in relation to the magnitude of  $\delta^{202}\text{Hg}$  shift  
 41 from TGM to foliage (A) and  $\Delta^{199}\text{Hg}$  shift from TGM to foliage (B). Site-specific average foliage  
 42 THg concentration in relation to the magnitude of  $\delta^{202}\text{Hg}$  shift from TGM to foliage (C) and  $\Delta^{199}\text{Hg}$   
 43 shift from TGM to foliage (D). The colors represent individual mountain site and are consistent  
 44 with Figure 2.

45

46

47

48

49

50

51

52

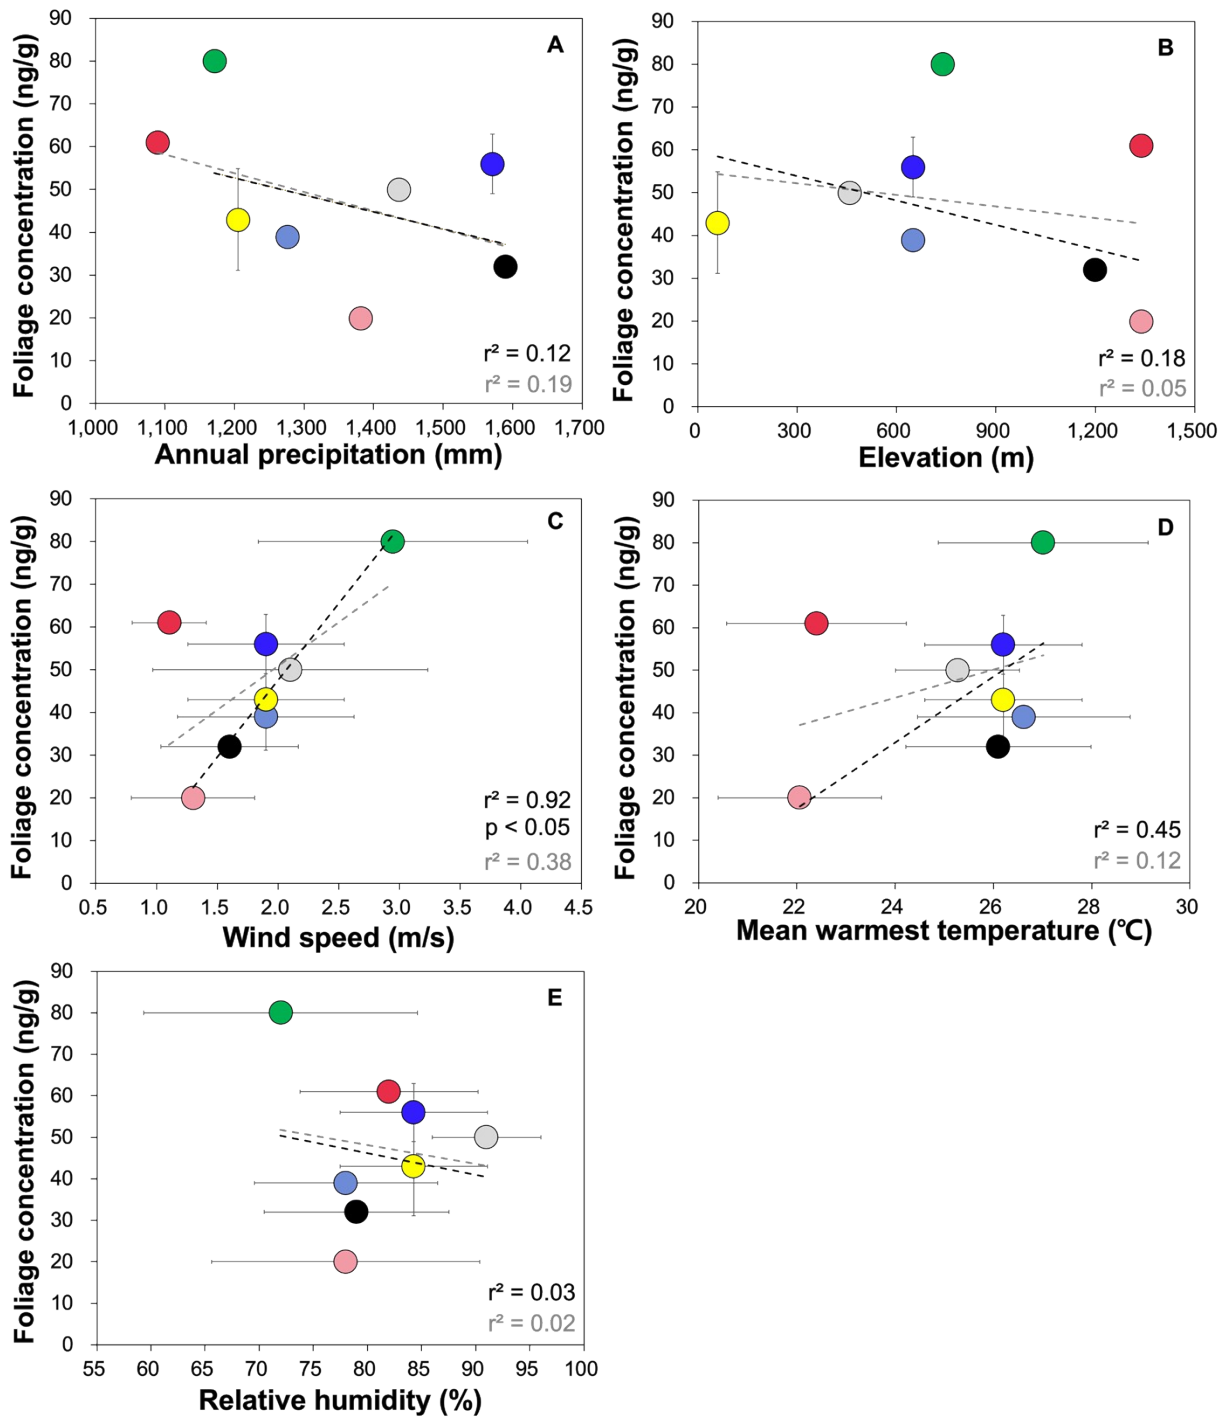

53

54 Figure S4. Site-specific average foliage THg concentration in relation to A) annual precipitation,  
 55 b) elevation, C) wind speed, D) mean warmest temperature, and E) relative humidity.

56

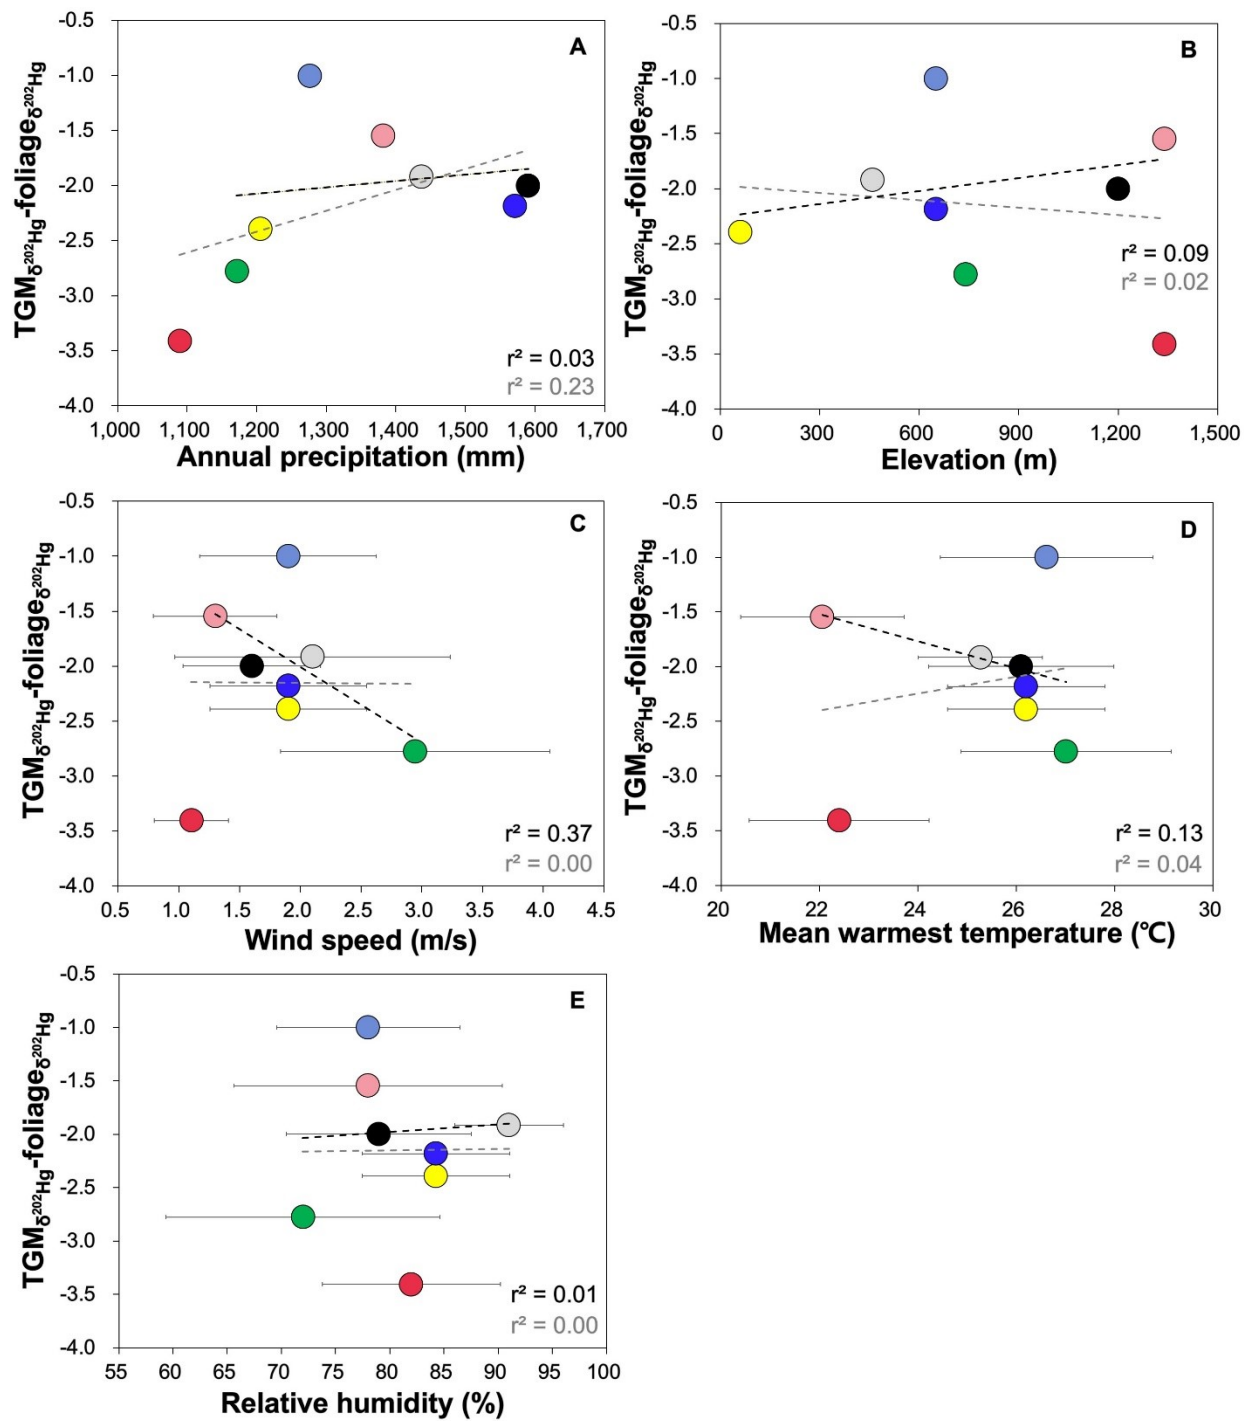

57

58 Figure S5. Magnitude of  $\delta^{202}\text{Hg}$  shift from TGM to foliage in relation to A) annual precipitation,  
 59 b) elevation, C) wind speed, D) mean warmest temperature, and E) relative humidity of each  
 60 mountain site of South Korea.

61

62

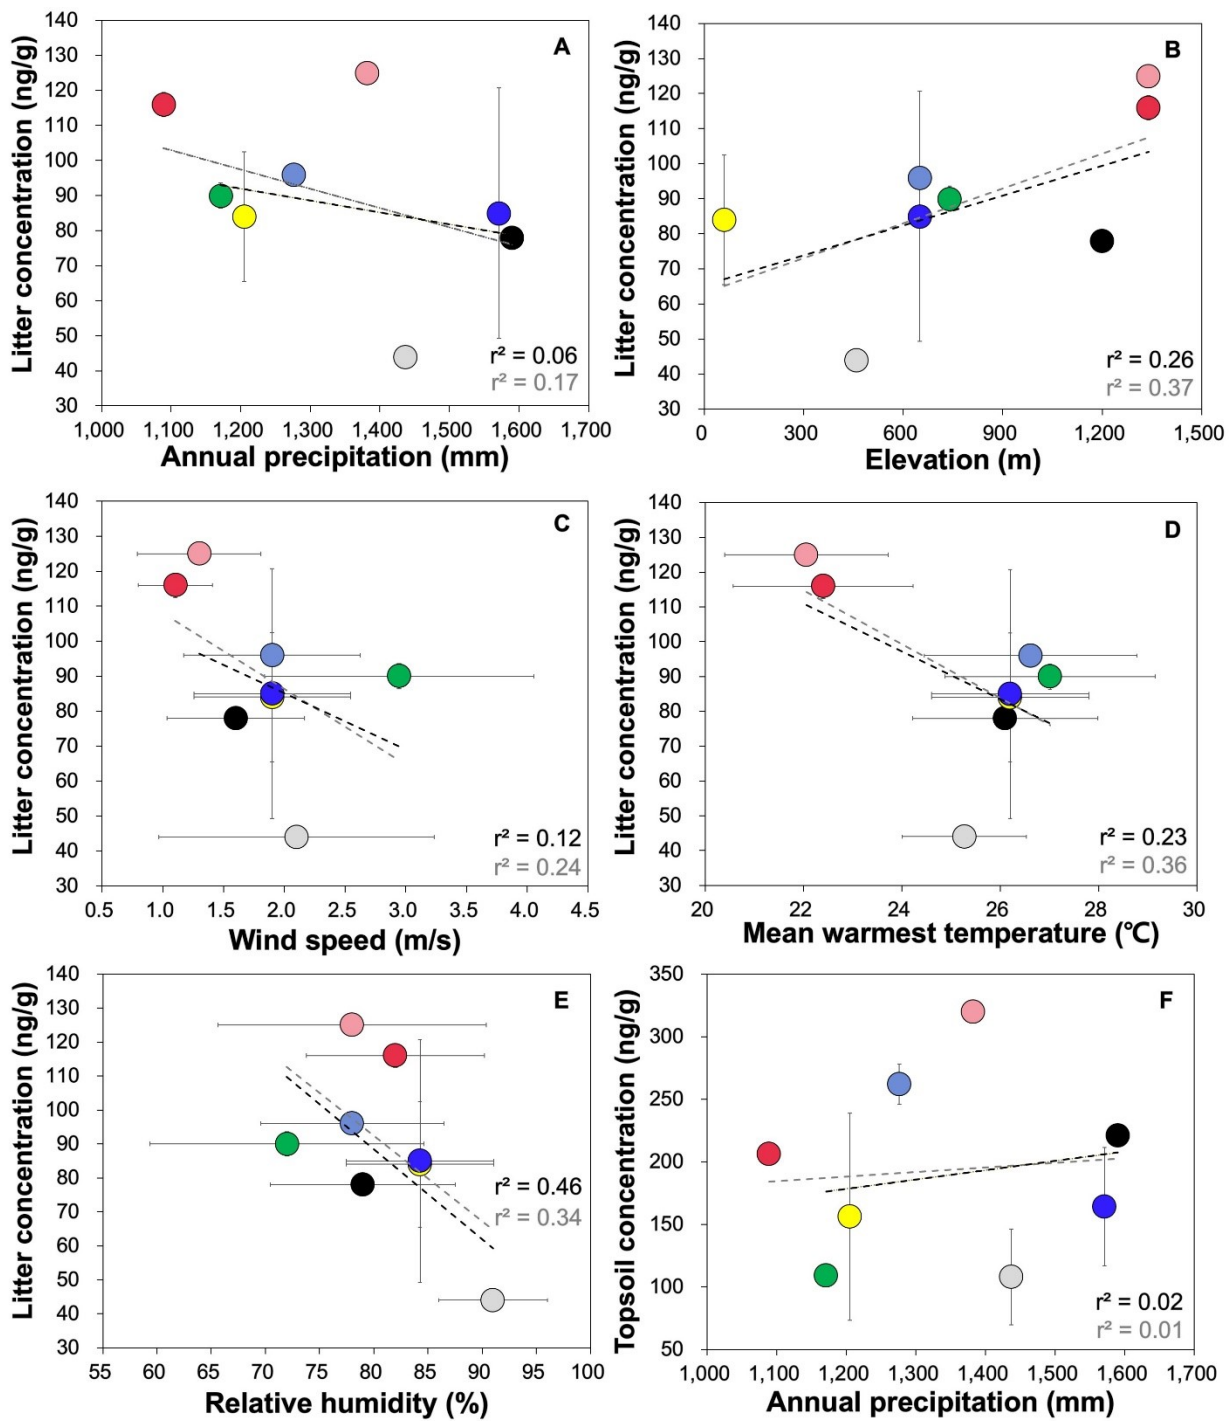

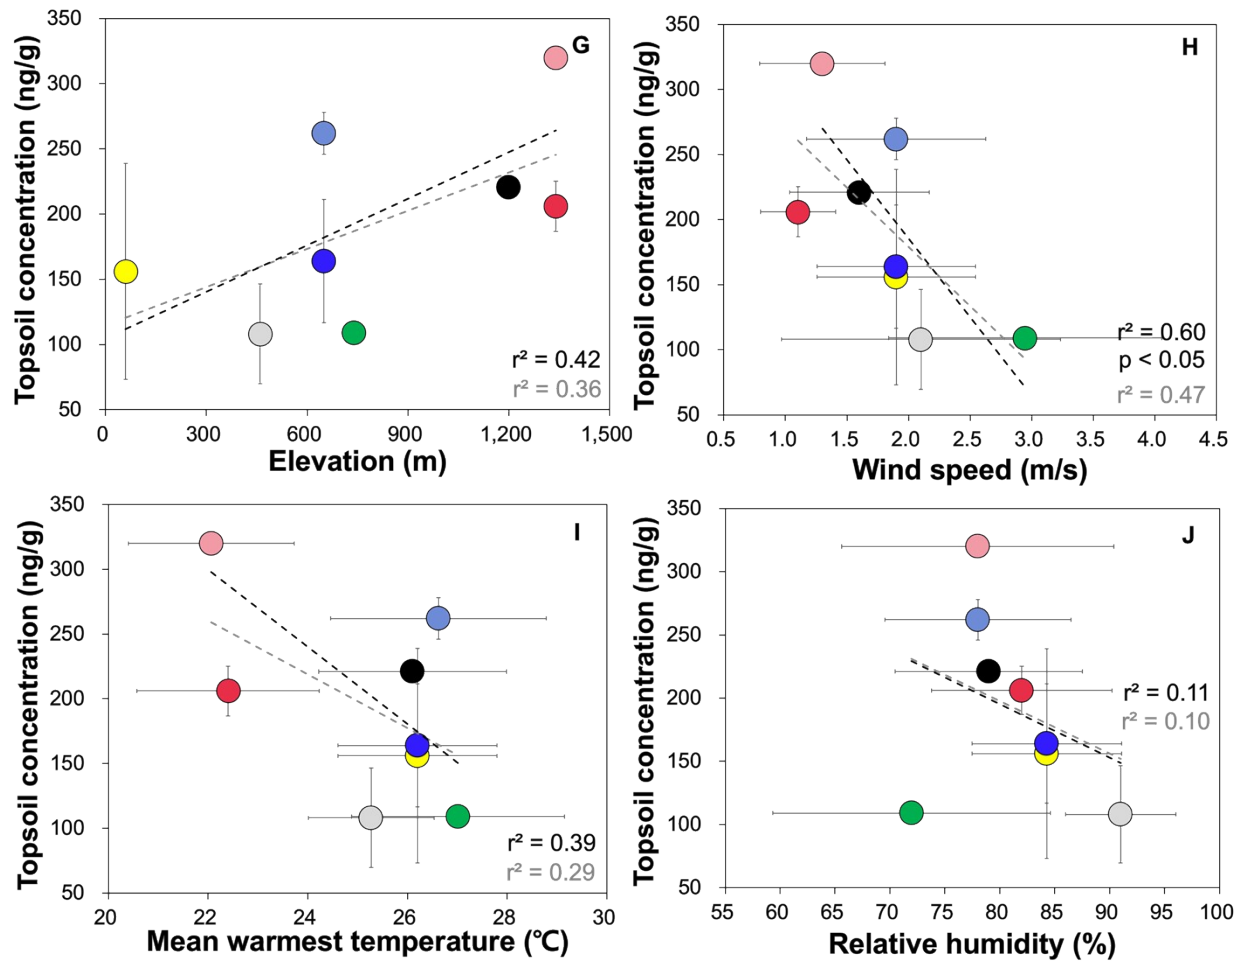

64

65 Figure S6. Site-specific average litter THg concentration in relation to A) annual precipitation, b)  
 66 elevation, C) wind speed, D) mean warmest temperature, and E) relative humidity. Site-specific  
 67 average topsoil THg concentration in relation to F) annual precipitation, G) elevation, H) wind  
 68 speed, I) mean warmest temperature, and J) relative humidity.

69

70

71

72

73

74

75

76

77



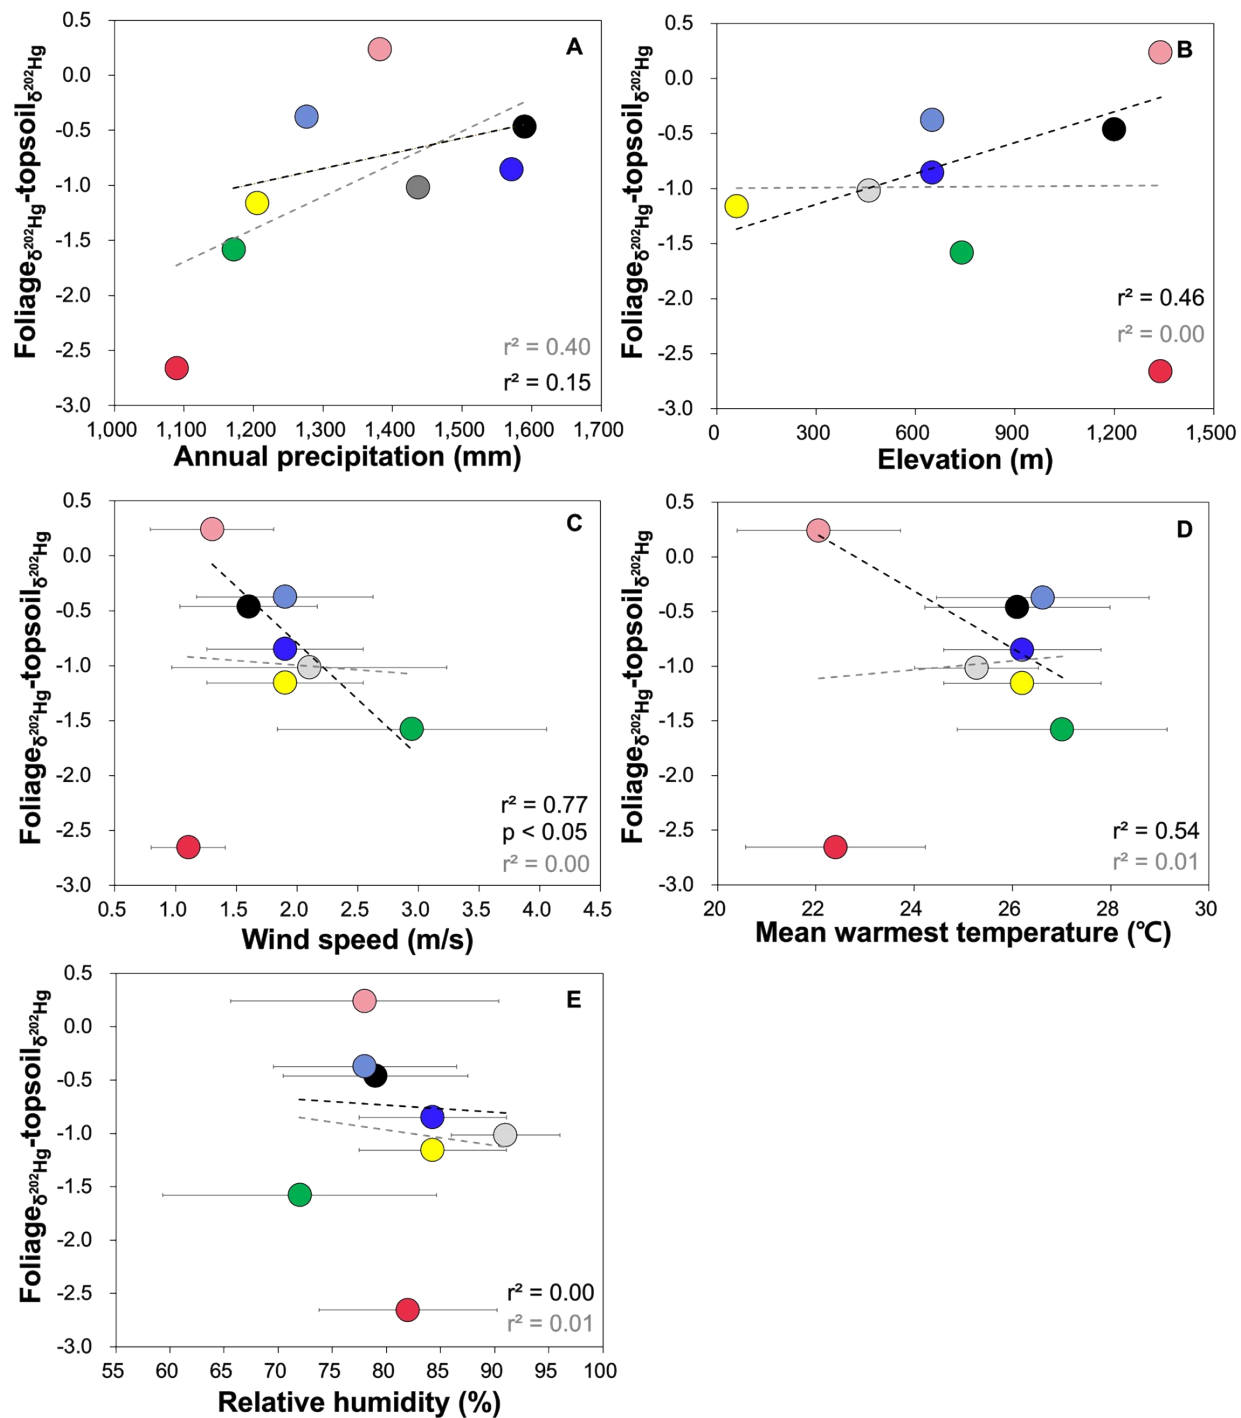

78

79 Figure S7. Magnitude of  $\delta^{202}\text{Hg}$  shift from foliage to topsoil in relation to A) annual precipitation,  
 80 b) elevation, C) wind speed, D) mean warmest temperature, and E) relative humidity of each  
 81 mountain site of South Korea.

82 Table S1. Locations and climatic/environmental information of six mountain sites.

| Site    | Description                                                      | Sample year | Latitude | Latitude | Elevation (m asl) | Humidity (%) | Mean warmest temperature (°C) | Annual precipitation (mm) | Wind speed (m/s) |
|---------|------------------------------------------------------------------|-------------|----------|----------|-------------------|--------------|-------------------------------|---------------------------|------------------|
| Bihak   | East coast, adjacent to a steel complex                          | 2019        | 36°15'N  | 129°23'E | 740               | 72           | 27                            | 1171                      | 2.9              |
| Mani    | West coast, adjacent to regions of dense coal fired power plants | 2020        | 36°62'N  | 126°43'E | 460               | 91           | 25.3                          | 1437                      | 2.1              |
| Hambak  | East coast, adjacent to a smelter                                | 2021, 2022  | 37°16'N  | 128°92'E | 1340              | 78, 82       | 22.6, 22.4                    | 1382, 1089                | 1.3, 1.1         |
| Jiri    | Inland, no pollution source within a 50 km radius                | 2021        | 35°36'N  | 127°52'E | 1200              | 79           | 26.1                          | 1590                      | 1.6              |
| Gaya    | West coast, adjacent to regions of dense coal fired power plants | 2021, 2022  | 36°70'N  | 126°61'E | 650               | 78, 84       | 26.6, 26.2                    | 1276, 1571                | 1.9, 1.9         |
| Seokmun | West coast, adjacent to                                          | 2022        |          |          | 60                | 84           | 26.2                          | 1205                      | 1.9              |

regions of coal fired

power plants

---

83

84

85

86

87

88

89

90

91

92

93

94

95

96

97

98

99

100 Table S2. Hg isotope ratios of standard reference materials measured in this study and other studies.

| SRM          | Sample type       | n  | $\delta^{202}\text{Hg}$ | $2\sigma$ | $\Delta^{201}\text{Hg}$ | $2\sigma$ | $\Delta^{200}\text{Hg}$ | $2\sigma$ | $\Delta^{199}\text{Hg}$ | $2\sigma$ | Reference                           |
|--------------|-------------------|----|-------------------------|-----------|-------------------------|-----------|-------------------------|-----------|-------------------------|-----------|-------------------------------------|
| ERM CE 464   | Tuna fish         | 1  | 0.56                    | -         | 1.86                    | -         | 0.08                    | -         | 2.31                    | -         | This study                          |
|              |                   | 3  | 0.66                    | 0.08      | 1.91                    | 0.06      | -                       | -         | 2.31                    | 0.09      | Kwon <i>et al.</i> <sup>1</sup>     |
|              |                   | 3  | 0.71                    | 0.08      | 1.89                    | 0.05      | 0.09                    | 0.08      | 2.28                    | 0.11      | Jung <i>et al.</i> <sup>2</sup>     |
|              |                   | 47 | 0.68                    | 0.01      | 1.97                    | 0.01      | 0.08                    | 0.01      | 2.40                    | 0.01      | Blum and Johnson <sup>3</sup>       |
|              |                   | 3  | 0.71                    | 0.03      | 2.00                    | 0.03      | 0.08                    | 0.01      | 2.40                    | 0.01      |                                     |
|              |                   | 10 | 0.70                    | 0.14      | 1.96                    | 0.10      | 0.08                    | 0.08      | 2.37                    | 0.14      | Lee <i>et al.</i> <sup>4</sup>      |
| TORT-3       | Lobster           | 4  | 0.04                    | 0.02      | 0.49                    | 0.06      | 0.05                    | 0.01      | 0.62                    | 0.03      | This study                          |
|              |                   | 3  | 0.06                    | 0.08      | 0.50                    | 0.07      | 0.06                    | 0.02      | 0.63                    | 0.10      | Jung <i>et al.</i> <sup>2</sup>     |
|              |                   | 4  | 0.07                    | 0.04      | 0.55                    | 0.08      | 0.06                    | 0.06      | 0.67                    | 0.05      | Blum and Johnson <sup>3</sup>       |
|              |                   | 10 | 0.06                    | 0.06      | 0.59                    | 0.11      | 0.07                    | 0.06      | 0.72                    | 0.07      | Enrico <i>et al.</i> <sup>5</sup>   |
|              |                   | 4  | 0.05                    | 0.08      | -                       | -         | -                       | -         | 0.66                    | 0.04      | Croizier <i>et al.</i> <sup>6</sup> |
|              |                   | 6  | 0.09                    | 0.16      | -                       | -         | -                       | -         | 0.65                    | 0.06      | Croizier <i>et al.</i> <sup>7</sup> |
| NIST 2711a   | Soil              | 5  | -0.08                   | 0.05      | -0.18                   | 0.02      | -0.02                   | 0.01      | -0.23                   | 0.01      | This study                          |
|              |                   | 3  | -0.13                   | 0.12      | -0.17                   | 0.06      | -0.05                   | 0.08      | -0.24                   | 0.02      | Jung <i>et al.</i> <sup>8</sup>     |
|              |                   | 3  | -                       | -         | -0.18                   | 0.06      | -0.03                   | 0.09      | -0.25                   | 0.09      | Grigg <i>et al.</i> <sup>9</sup>    |
|              |                   | 6  | -0.23                   | 0.06      | -0.19                   | 0.05      | 0.00                    | 0.03      | -0.20                   | 0.05      | Liu <i>et al.</i> <sup>10</sup>     |
| NIST RM 8610 | Standard solution | 40 | -0.53                   | 0.04      | -0.03                   | 0.02      | 0.01                    | 0.01      | -0.02                   | 0.01      | This study                          |
|              |                   | 40 | -0.54                   | 0.11      | -0.03                   | 0.06      | 0.01                    | 0.09      | -0.01                   | 0.12      | Jung <i>et al.</i> <sup>2</sup>     |
|              |                   | 6  | -0.54                   | 0.09      | -0.02                   | 0.08      | 0.00                    | 0.07      | -0.01                   | 0.05      | Jung <i>et al.</i> <sup>8</sup>     |

|     |       |        |       |        |      |        |       |        |                                    |
|-----|-------|--------|-------|--------|------|--------|-------|--------|------------------------------------|
| 88  | -0.53 | 0.05   | -0.04 | 0.03   | 0.01 | 0.03   | -0.02 | 0.05   | Lepak <i>et al.</i> <sup>11</sup>  |
| 42  | -0.56 | 0.16   | -     | -      | 0.00 | 0.08   | -0.02 | 0.08   | Lee <i>et al.</i> <sup>12</sup>    |
| 403 | -0.57 | <0.005 | -0.04 | <0.005 | 0.01 | <0.005 | -0.02 | <0.005 | Blum and Johnson, <sup>10</sup>    |
| 34  | -0.58 | 0.06   | -0.04 | 0.04   | 0.02 | 0.04   | -0.02 | 0.05   | Demers <i>et al.</i> <sup>13</sup> |

101  
102  
103  
104  
105  
106  
107  
108  
109  
110  
111  
112  
113  
114  
115

116 Table S3. Total gaseous mercury (TGM) concentration and Hg isotope ratios from six mountain sites.

| Sites   | Sample year | Concentration (ng/m <sup>3</sup> ) | $\delta^{202}\text{Hg}$ (‰) | $\Delta^{199}\text{Hg}$ (‰) | $\Delta^{200}\text{Hg}$ (‰) | $\Delta^{201}\text{Hg}$ (‰) | $\Delta^{204}\text{Hg}$ (‰) |
|---------|-------------|------------------------------------|-----------------------------|-----------------------------|-----------------------------|-----------------------------|-----------------------------|
| Bihak   | 2019        | 0.55                               | -0.50                       | -0.28                       | -0.07                       | -0.25                       | -0.41                       |
| Bihak   | 2019        | 0.72                               | 0.03                        | -0.19                       | -0.06                       | -0.12                       | -0.19                       |
| Bihak   | 2019        | 0.74                               | 0.04                        | -0.17                       | -0.10                       | -0.22                       | -0.16                       |
| Mani    | 2020        | 1.49                               | -0.35                       | -0.10                       | -0.03                       | -0.07                       | 0.07                        |
| Mani    | 2020        | 1.82                               | -0.02                       | -0.13                       | -0.05                       | -0.07                       | 0.03                        |
| Mani    | 2020        | 3.30                               | -1.04                       | 0.17                        | 0.01                        | 0.16                        | -0.01                       |
| Hambaek | 2021        | 3.27                               | -0.91                       | -0.07                       | -0.03                       | -0.01                       | 0.04                        |
| Hambaek | 2021        | 6.01                               | -1.06                       | 0.13                        | 0.02                        | 0.06                        | -0.02                       |
| Hambaek | 2021        | 1.93                               | -1.01                       | -0.03                       | -0.02                       | -0.08                       | 0.04                        |
| Hambaek | 2021        | 1.67                               | -0.59                       | -0.03                       | -0.01                       | -0.09                       | 0.04                        |
| Jiri    | 2021        | 3.44                               | -0.77                       | -0.08                       | -0.03                       | -0.11                       | 0.08                        |
| Jiri    | 2021        | 2.76                               | -1.37                       | -0.02                       | -0.02                       | -0.05                       | 0.03                        |
| Jiri    | 2021        | 5.87                               | 0.10                        | 0.06                        | -0.01                       | -0.01                       | 0.04                        |
| Gaya    | 2021        | 2.79                               | -0.69                       | -0.03                       | -0.02                       | -0.09                       | 0.04                        |

|         |      |      |       |       |       |       |      |
|---------|------|------|-------|-------|-------|-------|------|
| Gaya    | 2021 | 2.14 | -1.32 | -0.19 | -0.03 | -0.21 | 0.07 |
| Gaya    | 2021 | 2.76 | -1.33 | -0.09 | -0.04 | -0.08 | 0.06 |
| Gaya    | 2022 | 0.65 | -1.28 | -0.13 | -0.03 | -0.32 | 0.14 |
| Gaya    | 2022 | 0.61 | -1.01 | -0.12 | -0.07 | -0.42 | 0.18 |
| Gaya    | 2022 | 0.39 | -0.12 | -0.12 | -0.06 | -0.50 | 0.25 |
| Gaya    | 2022 | 0.40 | -1.51 | -0.17 | -0.10 | -0.82 | 0.44 |
| Seokmun | 2022 | 0.72 | -0.26 | -0.18 | -0.06 | -0.14 | 0.11 |
| Seokmun | 2022 | 0.76 | -0.43 | -0.15 | -0.05 | -0.19 | 0.12 |
| Seokmun | 2022 | 0.82 | 0.00  | -0.11 | -0.05 | -0.19 | 0.05 |
| Seokmun | 2022 | 0.60 | -0.97 | -0.04 | -0.04 | -0.42 | 0.31 |
| Hambaek | 2022 | 0.80 | -1.09 | -0.07 | -0.03 | -0.19 | 0.18 |
| Hambaek | 2022 | 0.74 | -0.98 | -0.04 | 0.01  | -0.20 | 0.16 |
| Hambaek | 2022 | 0.99 | -0.52 | -0.11 | -0.04 | -0.13 | 0.12 |
| Hambaek | 2022 | 0.52 | -0.83 | -0.70 | 0.00  | -0.20 | 0.11 |

---

117 Table S4. Total Hg (THg) concentration and Hg isotope ratios of all solid samples (foliage, litter, topsoil) from six mountain sites. N<sub>1</sub> denotes the  
 118 number of analyses for THg concentration and N<sub>2</sub> denotes the number of analyses for Hg isotopes.

| Site                | N <sub>1</sub> | Average THg<br>(ng/g) | 1σ | N <sub>2</sub> | δ <sup>202</sup> Hg<br>(‰) | 1σ   | Δ <sup>199</sup> Hg<br>(‰) | 1σ   | Δ <sup>200</sup> Hg<br>(‰) | 1σ   | Δ <sup>201</sup> Hg<br>(‰) | 1σ   | Δ <sup>204</sup> Hg<br>(‰) | 1σ   |
|---------------------|----------------|-----------------------|----|----------------|----------------------------|------|----------------------------|------|----------------------------|------|----------------------------|------|----------------------------|------|
| <b>Bihak 2019</b>   |                |                       |    |                |                            |      |                            |      |                            |      |                            |      |                            |      |
| Foliage             | 3              | 80                    | 2  | 3              | -2.29                      | 0.49 | -0.27                      | 0.02 | 0.00                       | 0.01 | -0.23                      | 0.01 | 0.02                       | 0.01 |
| Litter              | 3              | 90                    | 3  | 1              | -2.50                      |      | -0.25                      |      | -0.02                      |      | -0.37                      |      | 0.06                       |      |
| Topsoil             | 3              | 109                   | 3  | 1              | -1.34                      |      | -0.21                      |      | 0.01                       |      | -0.22                      |      | -0.02                      |      |
| <b>Mani 2020</b>    |                |                       |    |                |                            |      |                            |      |                            |      |                            |      |                            |      |
| Foliage             | 3              | 50                    | 1  | 3              | -2.38                      | 0.17 | -0.23                      | 0.02 | -0.02                      | 0.01 | -0.07                      | 0.19 | 0.03                       | 0.03 |
| Litter              | 3              | 44                    | 1  | 3              | -2.19                      | 0.16 | -0.20                      | 0.01 | 0.01                       | 0.02 | -0.20                      | 0.03 | 0.01                       | 0.02 |
| Topsoil             | 3              | 108                   | 38 | 2              | -1.37                      | 0.01 | -0.16                      | 0.02 | 0.00                       | 0.01 | -0.15                      | 0.02 | 0.02                       | 0.01 |
| <b>Hambaek 2021</b> |                |                       |    |                |                            |      |                            |      |                            |      |                            |      |                            |      |
| Foliage             | 3              | 20                    | 0  | 1              | -2.44                      | -    | -0.14                      | -    | 0.00                       | -    | -0.13                      | -    | 0.01                       | -    |
| Litter              | 3              | 125                   | 2  | 3              | -2.60                      | 0.09 | -0.21                      | 0.02 | -0.01                      | 0.01 | -0.22                      | 0.02 | 0.01                       | 0.01 |



|         |   |     |   |   |       |      |       |      |      |      |       |      |       |      |
|---------|---|-----|---|---|-------|------|-------|------|------|------|-------|------|-------|------|
| Topsoil | 3 | 320 | 4 | 3 | -2.68 | 0.15 | -0.19 | 0.01 | 0.02 | 0.00 | -0.22 | 0.06 | -0.01 | 0.03 |
|---------|---|-----|---|---|-------|------|-------|------|------|------|-------|------|-------|------|

**Hambaek 2022**

|         |   |    |     |   |       |      |       |      |       |      |       |      |      |      |
|---------|---|----|-----|---|-------|------|-------|------|-------|------|-------|------|------|------|
| Foliage | 2 | 61 | 0.5 | 2 | -4.26 | 0.29 | -0.49 | 0.04 | -0.06 | 0.00 | -0.35 | 0.01 | 0.15 | 0.05 |
|---------|---|----|-----|---|-------|------|-------|------|-------|------|-------|------|------|------|

|        |   |     |   |   |       |      |       |      |       |      |       |      |      |      |
|--------|---|-----|---|---|-------|------|-------|------|-------|------|-------|------|------|------|
| Litter | 3 | 116 | 2 | 3 | -3.01 | 0.11 | -0.28 | 0.04 | -0.02 | 0.02 | -0.25 | 0.01 | 0.09 | 0.05 |
|--------|---|-----|---|---|-------|------|-------|------|-------|------|-------|------|------|------|

|         |   |     |   |   |       |      |       |      |      |      |       |      |       |      |
|---------|---|-----|---|---|-------|------|-------|------|------|------|-------|------|-------|------|
| Topsoil | 3 | 206 | 4 | 3 | -1.60 | 0.14 | -0.33 | 0.01 | 0.00 | 0.00 | -0.36 | 0.01 | -0.07 | 0.00 |
|---------|---|-----|---|---|-------|------|-------|------|------|------|-------|------|-------|------|

**Jiri 2021**

|         |   |    |   |   |       |      |       |      |      |      |       |      |      |      |
|---------|---|----|---|---|-------|------|-------|------|------|------|-------|------|------|------|
| Foliage | 3 | 32 | 1 | 3 | -2.67 | 0.14 | -0.15 | 0.03 | 0.00 | 0.02 | -0.15 | 0.02 | 0.02 | 0.02 |
|---------|---|----|---|---|-------|------|-------|------|------|------|-------|------|------|------|

|        |   |    |   |   |       |      |       |      |       |      |       |      |      |      |
|--------|---|----|---|---|-------|------|-------|------|-------|------|-------|------|------|------|
| Litter | 3 | 78 | 2 | 3 | -2.38 | 0.03 | -0.21 | 0.03 | -0.02 | 0.02 | -0.19 | 0.01 | 0.05 | 0.01 |
|--------|---|----|---|---|-------|------|-------|------|-------|------|-------|------|------|------|

|         |   |     |   |   |       |      |       |      |      |      |       |      |       |      |
|---------|---|-----|---|---|-------|------|-------|------|------|------|-------|------|-------|------|
| Topsoil | 3 | 221 | 7 | 3 | -2.21 | 0.06 | -0.23 | 0.00 | 0.01 | 0.01 | -0.21 | 0.01 | -0.02 | 0.00 |
|---------|---|-----|---|---|-------|------|-------|------|------|------|-------|------|-------|------|

**Gaya 2021**

|         |   |    |   |   |       |      |      |      |      |      |      |      |      |      |
|---------|---|----|---|---|-------|------|------|------|------|------|------|------|------|------|
| Foliage | 3 | 39 | 1 | 3 | -2.11 | 0.07 | 0.18 | 0.03 | 0.01 | 0.02 | 0.15 | 0.04 | 0.03 | 0.02 |
|---------|---|----|---|---|-------|------|------|------|------|------|------|------|------|------|

|        |   |    |   |   |       |      |       |      |       |      |       |      |      |      |
|--------|---|----|---|---|-------|------|-------|------|-------|------|-------|------|------|------|
| Litter | 3 | 96 | 2 | 3 | -2.31 | 0.02 | -0.07 | 0.02 | -0.03 | 0.02 | -0.04 | 0.03 | 0.04 | 0.01 |
|--------|---|----|---|---|-------|------|-------|------|-------|------|-------|------|------|------|

|         |   |     |    |   |       |      |       |      |      |      |       |      |       |      |
|---------|---|-----|----|---|-------|------|-------|------|------|------|-------|------|-------|------|
| Topsoil | 3 | 262 | 16 | 3 | -1.74 | 0.02 | -0.25 | 0.01 | 0.01 | 0.00 | -0.24 | 0.01 | -0.01 | 0.00 |
|---------|---|-----|----|---|-------|------|-------|------|------|------|-------|------|-------|------|

**Gaya 2022**

|         |   |    |   |   |       |      |       |      |       |      |       |      |      |      |
|---------|---|----|---|---|-------|------|-------|------|-------|------|-------|------|------|------|
| Foliage | 2 | 56 | 1 | 2 | -3.16 | 0.12 | -0.04 | 0.06 | -0.07 | 0.00 | -0.02 | 0.04 | 0.00 | 0.01 |
|---------|---|----|---|---|-------|------|-------|------|-------|------|-------|------|------|------|

|                     |   |     |    |   |       |      |       |      |       |      |       |      |       |      |
|---------------------|---|-----|----|---|-------|------|-------|------|-------|------|-------|------|-------|------|
| Litter              | 3 | 85  | 2  | 3 | -2.51 | 0.10 | -0.06 | 0.01 | -0.02 | 0.02 | -0.08 | 0.01 | 0.04  | 0.05 |
| Topsoil             | 3 | 164 | 16 | 3 | -2.31 | 1.31 | -0.06 | 0.24 | 0.03  | 0.01 | -0.09 | 0.25 | 0.01  | 0.06 |
| <b>Seokmun 2022</b> |   |     |    |   |       |      |       |      |       |      |       |      |       |      |
| Foliage             | 3 | 43  | 5  | 3 | -2.80 | 0.22 | -0.19 | 0.01 | -0.03 | 0.01 | -0.18 | 0.01 | 0.07  | 0.02 |
| Litter              | 3 | 84  | 2  | 3 | -2.44 | 0.29 | -0.15 | 0.02 | -0.01 | 0.02 | -0.23 | 0.05 | -0.01 | 0.07 |
| Topsoil             | 3 | 156 | 16 | 3 | -1.65 | 0.07 | -0.27 | 0.03 | 0.01  | 0.01 | -0.31 | 0.03 | 0.01  | 0.03 |

---

119

120

121

122

123

124

125

126

127

128 Table S5. Fractions of two Hg sources (end-members; Hg<sup>0</sup> and Hg<sup>2+</sup>) in the all solid samples (foliage, litter, topsoil) from six mountain sites. The  
 129 average  $\Delta^{200}\text{Hg}$  of our TGM and the average  $\Delta^{200}\text{Hg}$  of precipitation sampled from various regions of the world.<sup>14-25</sup>

| Sites        | Foliage         |                  | Litter          |                  | Topsoil         |                  |
|--------------|-----------------|------------------|-----------------|------------------|-----------------|------------------|
|              | Hg <sup>0</sup> | Hg <sup>2+</sup> | Hg <sup>0</sup> | Hg <sup>2+</sup> | Hg <sup>0</sup> | Hg <sup>2+</sup> |
| Jiri 2021    | 0.82            | 0.18             | 0.92            | 0.08             | 0.75            | 0.25             |
| Hambaek 2021 | 0.84            | 0.16             | 0.85            | 0.15             | 0.73            | 0.27             |
| Gaya 2021    | 0.76            | 0.24             | 0.98            | 0.02             | 0.75            | 0.25             |
| Mani 2020    | 0.93            | 0.07             | 0.78            | 0.22             | 0.84            | 0.16             |
| Hambaek 2022 | 1.12            | -0.12            | 0.92            | 0.08             | 0.80            | 0.20             |
| Seokmun 2022 | 0.96            | 0.04             | 0.87            | 0.13             | 0.74            | 0.26             |
| Bihak 2019   | 0.82            | 0.18             | 0.89            | 0.11             | 0.78            | 0.22             |
| Gaya 2022    | 1.17            | -0.17            | 0.92            | 0.08             | 0.69            | 0.31             |

131 **References**

132 1. S. Y. Kwon, J. D. Blum, C. Y. Chen, D. E. Meattley and R. P. Mason, Mercury isotope study of  
133 sources and exposure pathways of methylmercury in estuarine food webs in the Northeastern  
134 US, *Environ. Sci. Technol.*, 2014, **48**, 10089–10097.

135

136 2. S. Jung, S. Y. Kwon, M.-L. Li, R. Yin and J. Park, Elucidating sources of mercury in the west  
137 coast of Korea and the Chinese marginal seas using mercury stable isotopes, *Sci. Total Environ.*,  
138 2022, **814**, 152598.

139

140 3. J. D. Blum and M. W. Johnson, Recent Developments in Mercury Stable Isotope Analysis, *Rev.*  
141 *Mineral. Geochem.*, 2017, **82**, 733–757.

142

143 4. B. J. Lee, S. Y. Kwon, R. Yin, M. Li, S. Jung, S. H. Lim, J. H. Lee, K. W. Kim, K. D. Kim and  
144 J. W. Jang, Internal dynamics of inorganic and methylmercury in a marine fish: Insights from  
145 mercury stable isotopes, *Environ. Pollut.*, 2020, **267**, 115588.

146

147 5. M. Enrico, P. Balcom, D. T. Johnston, J. Foriel and E. M. Sunderland, Simultaneous combustion  
148 preparation for mercury isotope analysis and detection of total mercury using a direct mercury  
149 analyzer, *Anal. Chim. Acta*, 2021, **1154**, 338327.

150

151 6. G. L. Croizier, A. Lorrain, J. E. Sonke, S. Jaquemet, G. Schaal, M. Renedo, L. Besnard, Y.  
152 Cherel and D. Point, Mercury isotopes as tracers of ecology and metabolism in two sympatric  
153 shark species, *Environ. Pollut.*, 2020, **265**, 114931

154

155 7. G. L. Croizier, A. Lorrain, J. E. Sonke, E. M. Hoyos-Padila, F. Galván-Magaña, O. Santana-  
156 Morales, M. Aquino-Baleyto, E. E. Becerril-García, G. Muntaner-López, J. Ketchum, B. Block,  
157 A. Carlisle, S. J. Jorgensen, L. Besnard, A. Jung, G. Schaal and D. Point, The twilight zone as  
158 a major foraging habitat and mercury source for the great white shark, *Environ. Sci. Technol.*,  
159 2020, **54**, 15872-15882.

160

161 8. S. Jung, S. Y. Kwon, Y. Hong, R. Yin and L. C. Motta, Isotope investigation of mercury sources  
162 in a creek impacted by multiple anthropogenic activities, *Chemosphere*, 2021, **282**, 130947.

163

- 164 9. A. R., Grigg, R. Kretzschmar, R. S. Gilli and J. G. Wiederhold, Mercury isotope signatures of  
165 digests and sequential extracts from industrially contaminated soils and sediments, *Sci. Total*  
166 *Environ.*, 2018, **636**, 1344-1354.
- 167
- 168 10. C. Liu, X. Fu, Y. Xu, H. Zhang, X. Wu, J. Sommar, L. Zhang, X. Wang and X. Feng, Sources  
169 and transformation mechanisms of atmospheric particulate bound mercury revealed by  
170 mercury stable isotopes, *Environ. Sci. Technol.*, 2022, **56**, 5224-5233.
- 171
- 172 11. R. F. Lepak, S. E. Janssen, D. R. Engstrom, D. P. Krabbenhoft, M. T. Tate, R. Yin, W. F.  
173 Fitzgerald, S. A. Nagorski and J. P. Hurley, Resolving atmospheric mercury loading and source  
174 trends from isotopic records of remote North American lake sediments, *Environ. Sci. Technol.*,  
175 2020, **54**, 9325-9333.
- 176
- 177 12. J. H. Lee, S. Y. Kwon, H. Lee, S.-I. Nam, J.-H. Kim, Y. J. Joo, K. Jang, H. Kim and R. Yin,  
178 Climate-associated changes in mercury sources in the arctic fjord sediments, *ACS Earth Space*  
179 *Chem.*, 2021, **5**, 2398–2407.
- 180
- 181 13. J. D. Demers, J. D. Blum, S. C. Brooks, P. M. Donovan, A. L. Riscassi, C. L. Miller, W. Zheng  
182 and B. Gu, Hg isotopes reveal in-stream processing and legacy inputs in East Fork Poplar  
183 Creek, Oak Ridge, Tennessee, USA, *Environ. Sci. Process Impacts*, 2018, **20**, 686-707.
- 184
- 185 14. Demers, J.D., Blum, J.D., Zak, D.R., 2013. Mercury isotopes in a forested ecosystem:  
186 implications for air-surface exchange dynamics and the global mercury cycle. *Glob.*  
187 *Biogeochem. Cycles* 27 (1), 222–238. <https://doi.org/10.1002/gbc.20021>.
- 188
- 189 15. Yuan, S., Zhang, Y., Chen, J., Kang, S., Zhang, J., Feng, X., Cai, H., Wang, Z., Wang, Z.,  
190 Huang, Q., 2015. Large variation of mercury isotope composition during a single precipitation  
191 event at Lhasa City, Tibetan Plateau, China. *Proced. Earth Plan. Sci.* 13, 282–286.  
192 <https://doi.org/10.1016/j.proeps.2015.07.066>.
- 193
- 194 16. Chen, J., Hintelmann, H., Feng, X., Dimock, B., 2012. Unusual fractionation of both odd and  
195 even mercury isotopes in precipitation from Peterborough, ON, Canada. *Geochim.*  
196 *Cosmochim. Acta* 90, 33–46. <https://doi.org/10.1016/j.gca.2012.05.005>.
- 197
- 198 17. Donovan, P.M., Blum, J.D., Yee, D., Gehrke, G.E., Singer, M.B., 2013. An isotopic record of  
199 mercury in San Francisco Bay sediment. *Chem. Geol.* 349, 87–98. <https://doi.org/>

200 10.1016/j.chemgeo.2013.04.017.

201

202 18. Sherman, L.S., Blum, J.D., Keeler, G.J., Demers, J.D., Dvonch, J.T., 2012. Investigation of  
203 local mercury deposition from a coal-fired power plant using mercury isotopes. *Environ. Sci.*  
204 *Technol.* 46 (1), 382–390. <https://doi.org/10.1021/es202793c>.

205

206 19. Sherman, L.S., Blum, J.D., Dvonch, J.T., Gratz, L.E., Landis, M.S., 2015. The use of Pb, Sr,  
207 and Hg isotopes in Great Lakes precipitation as a tool for pollution source attribution. *Sci.*  
208 *Total Environ.* 502, 362–374. <https://doi.org/10.1016/j.scitotenv.2014.09.034>.

209

210 20. Gratz, L.E., Keeler, G.J., Blum, J.D., Sherman, L.S., 2010. Isotopic composition and  
211 fractionation of mercury in Great Lakes precipitation and ambient air. *Environ. Sci. Technol.*  
212 (20), 7764–7770. <https://doi.org/10.1021/es100383w>.

213

214 21. Wang, Z., Chen, J., Feng, X., Hintelmann, H., Yuan, S., Cai, H., ... & Wang, F. (2015). Mass-  
215 dependent and mass-independent fractionation of mercury isotopes in precipitation from  
216 Guiyang, SW China. *Comptes Rendus Geoscience*, 347(7-8), 358-367.

217

218 22. Huang, S., Sun, L., Zhou, T., Yuan, D., Du, B., Sun, X., 2018. Natural stable isotopic  
219 compositions of mercury in aerosols and wet precipitations around a coal-fired power plant in  
220 Xiamen, southeast China. *Atmos. Environ.* 173, 72–80. [https://doi.org/10.](https://doi.org/10.1016/j.atmosenv.2017.11.003)  
221 [1016/j.atmosenv.2017.11.003](https://doi.org/10.1016/j.atmosenv.2017.11.003).

222

223 23. Motta, L.C., Blum, J.D., Johnson, M.W., Umhau, B.P., Popp, B.N., Washburn, S.J., Drazen,  
224 J.C., Benitez-Nelson, C.R., Hannides, C.C.S., Close, H.G., Lamborg, C.H., 2019. Mercury  
225 cycling in the North Pacific Subtropical Gyre as revealed by mercury stable isotope ratios.  
226 *Global Biogeochem. Cyc.* 33, 777–794. [https://doi.org/10.1029/](https://doi.org/10.1029/2018GB006057) 2018GB006057.

227

228 24. Enrico, M., Roux, G.L., Maruszczak, N., Heimbürger, L.E., Claustres, A., Fu, X., Sun, R.,  
229 Sonke, J.E., 2016. Atmospheric mercury transfer to peat bogs dominated by gaseous elemental  
230 mercury dry deposition. *Environ. Sci. Technol.* 50, 2405–2412. [https://doi.](https://doi.org/10.1021/acs.est.5b06058)  
231 [org/10.1021/acs.est.5b06058](https://doi.org/10.1021/acs.est.5b06058).

232

233 25. Fu, X., Jiskra, M., Yang, X., Maruszczak, N., Enrico, M., Chmeleff, J., ... & Sonke, J. E. (2021).  
234 Mass-independent fractionation of even and odd mercury isotopes during atmospheric mercury  
235 redox reactions. *Environmental science & technology*, 55(14), 10164-10174.
