# Supplementary figures and images for: Atmospheric mercury uptake and accumulation in forests dependent on climatic factors
Source: Royal Society of Chemistry journal article supplement (doi:10.1039/d3em00454f), 2024-01-01

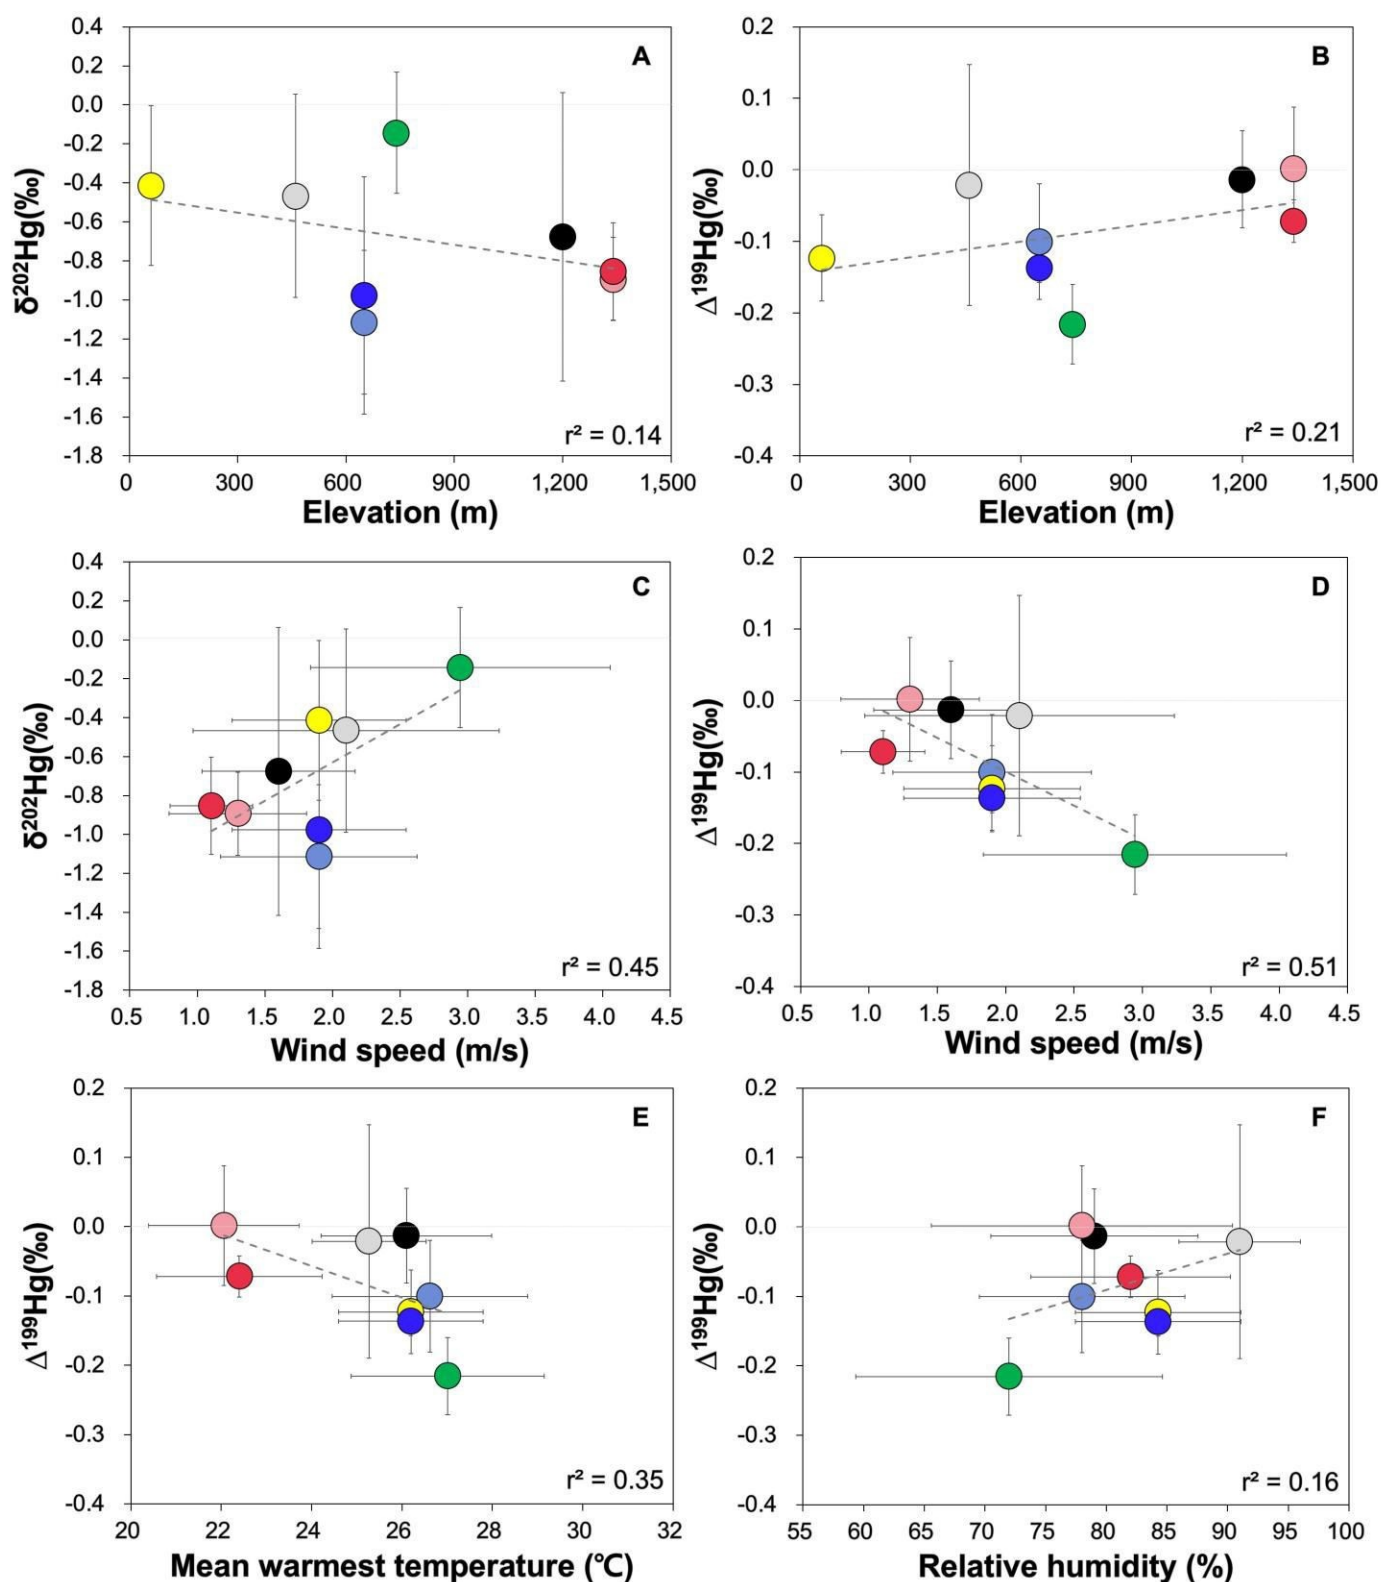

Figure S1

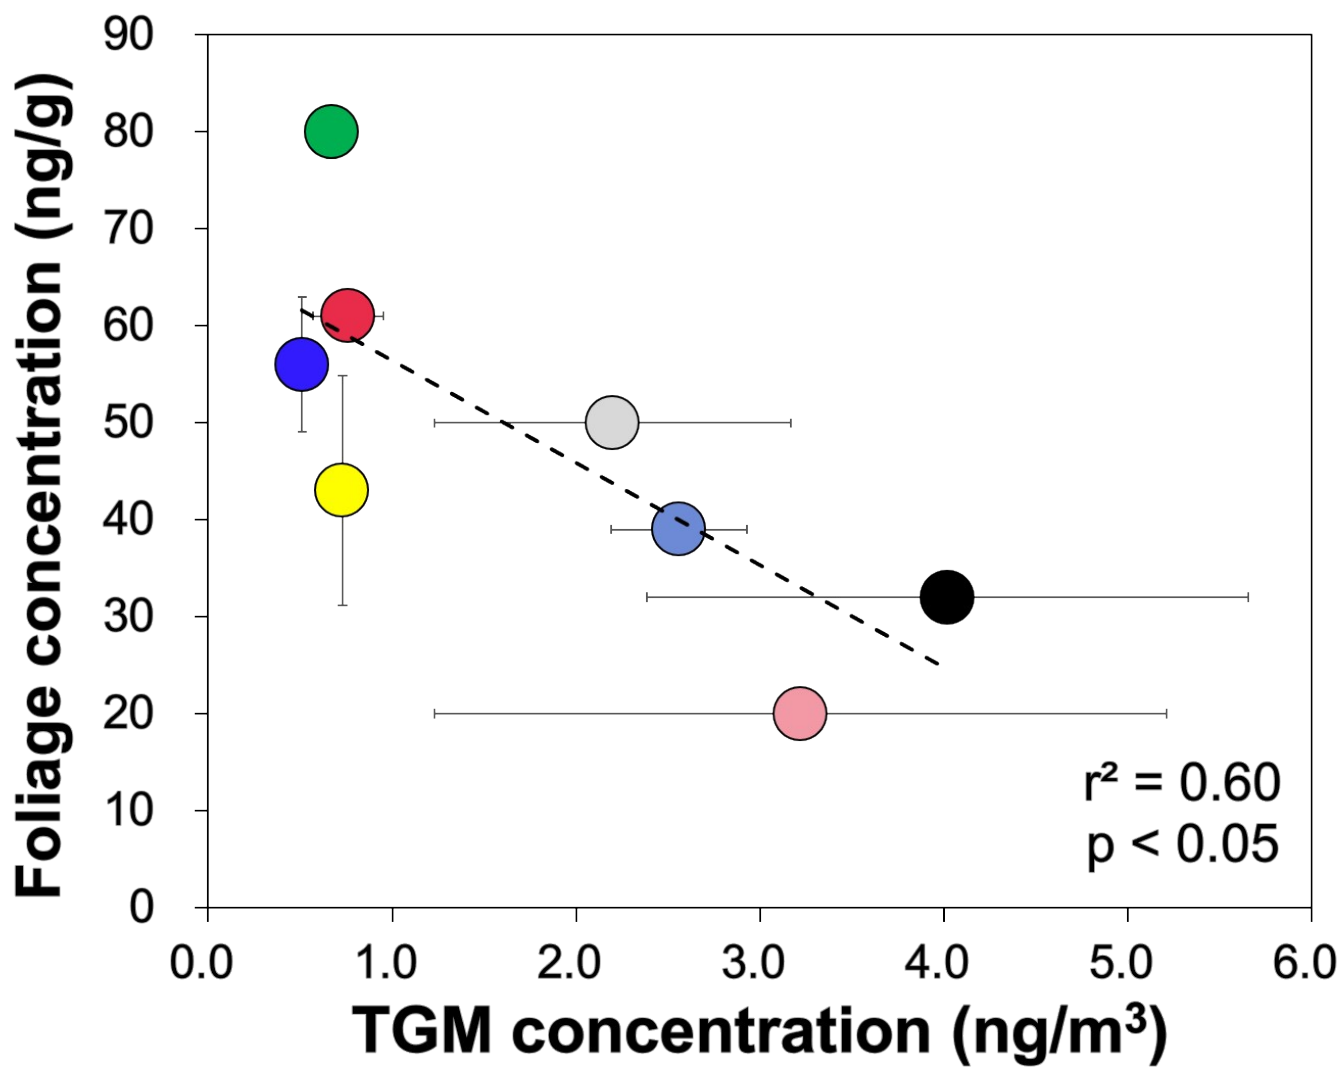

Figure S2

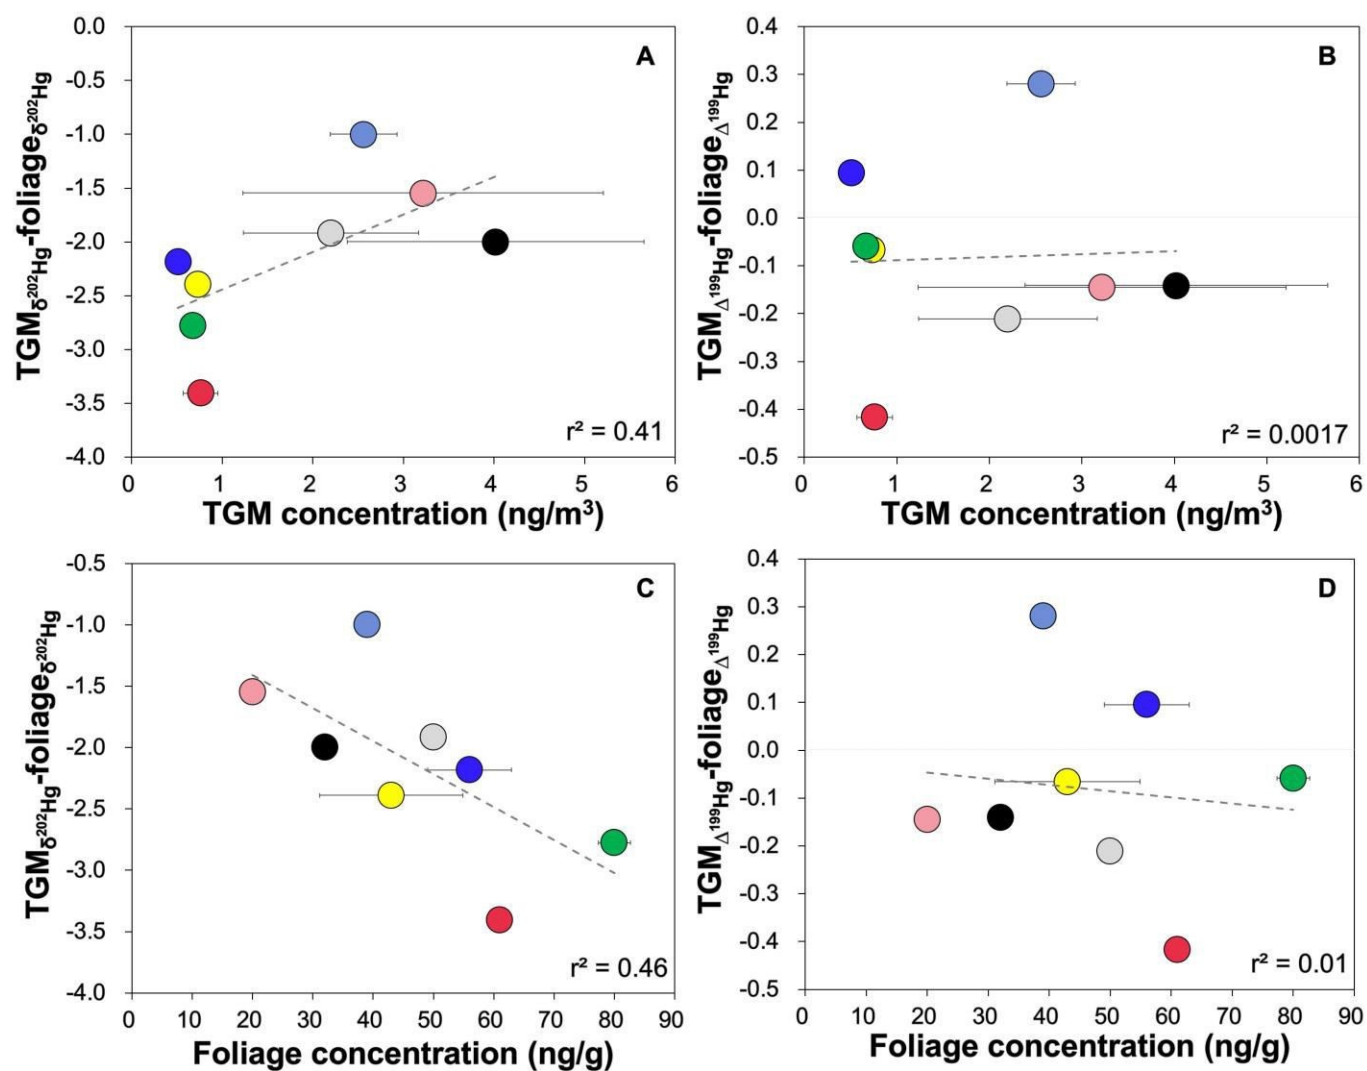

Figure S3

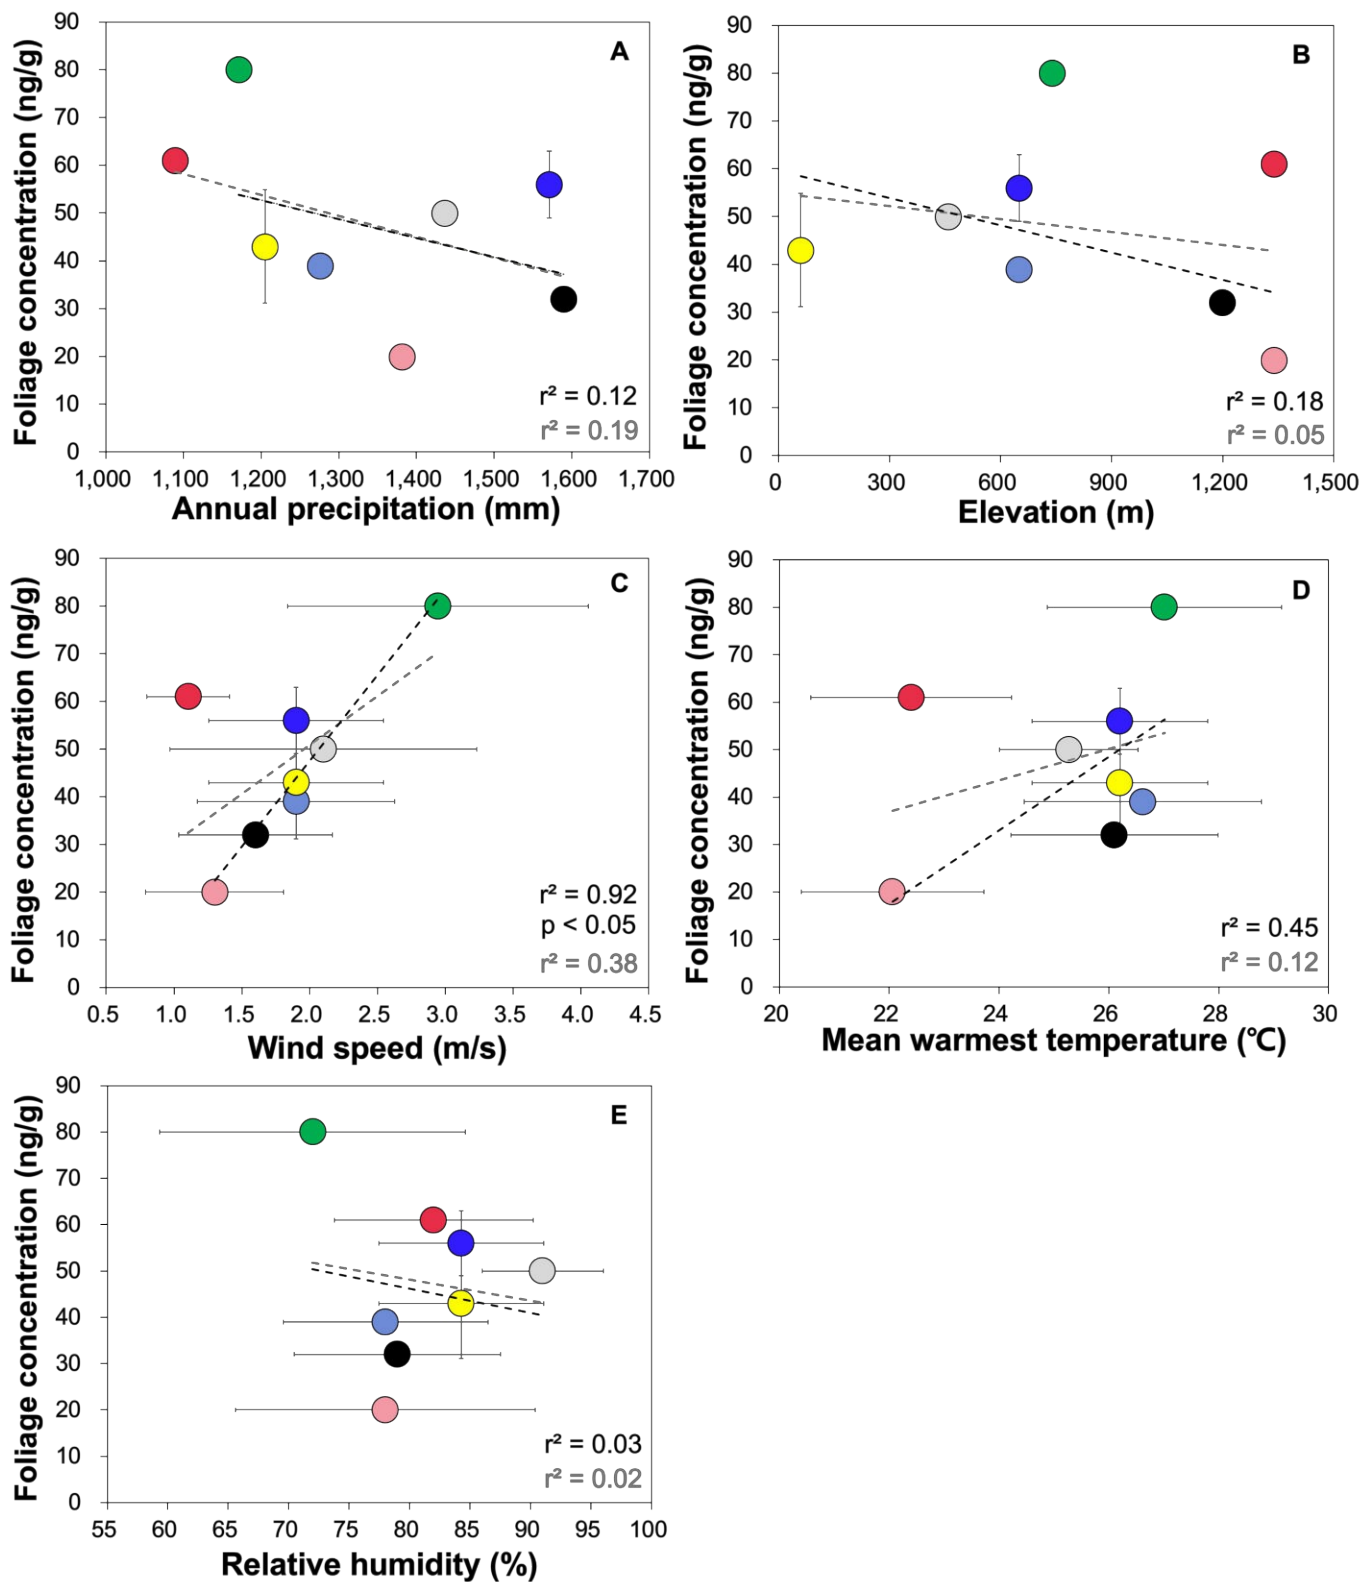

Figure S4

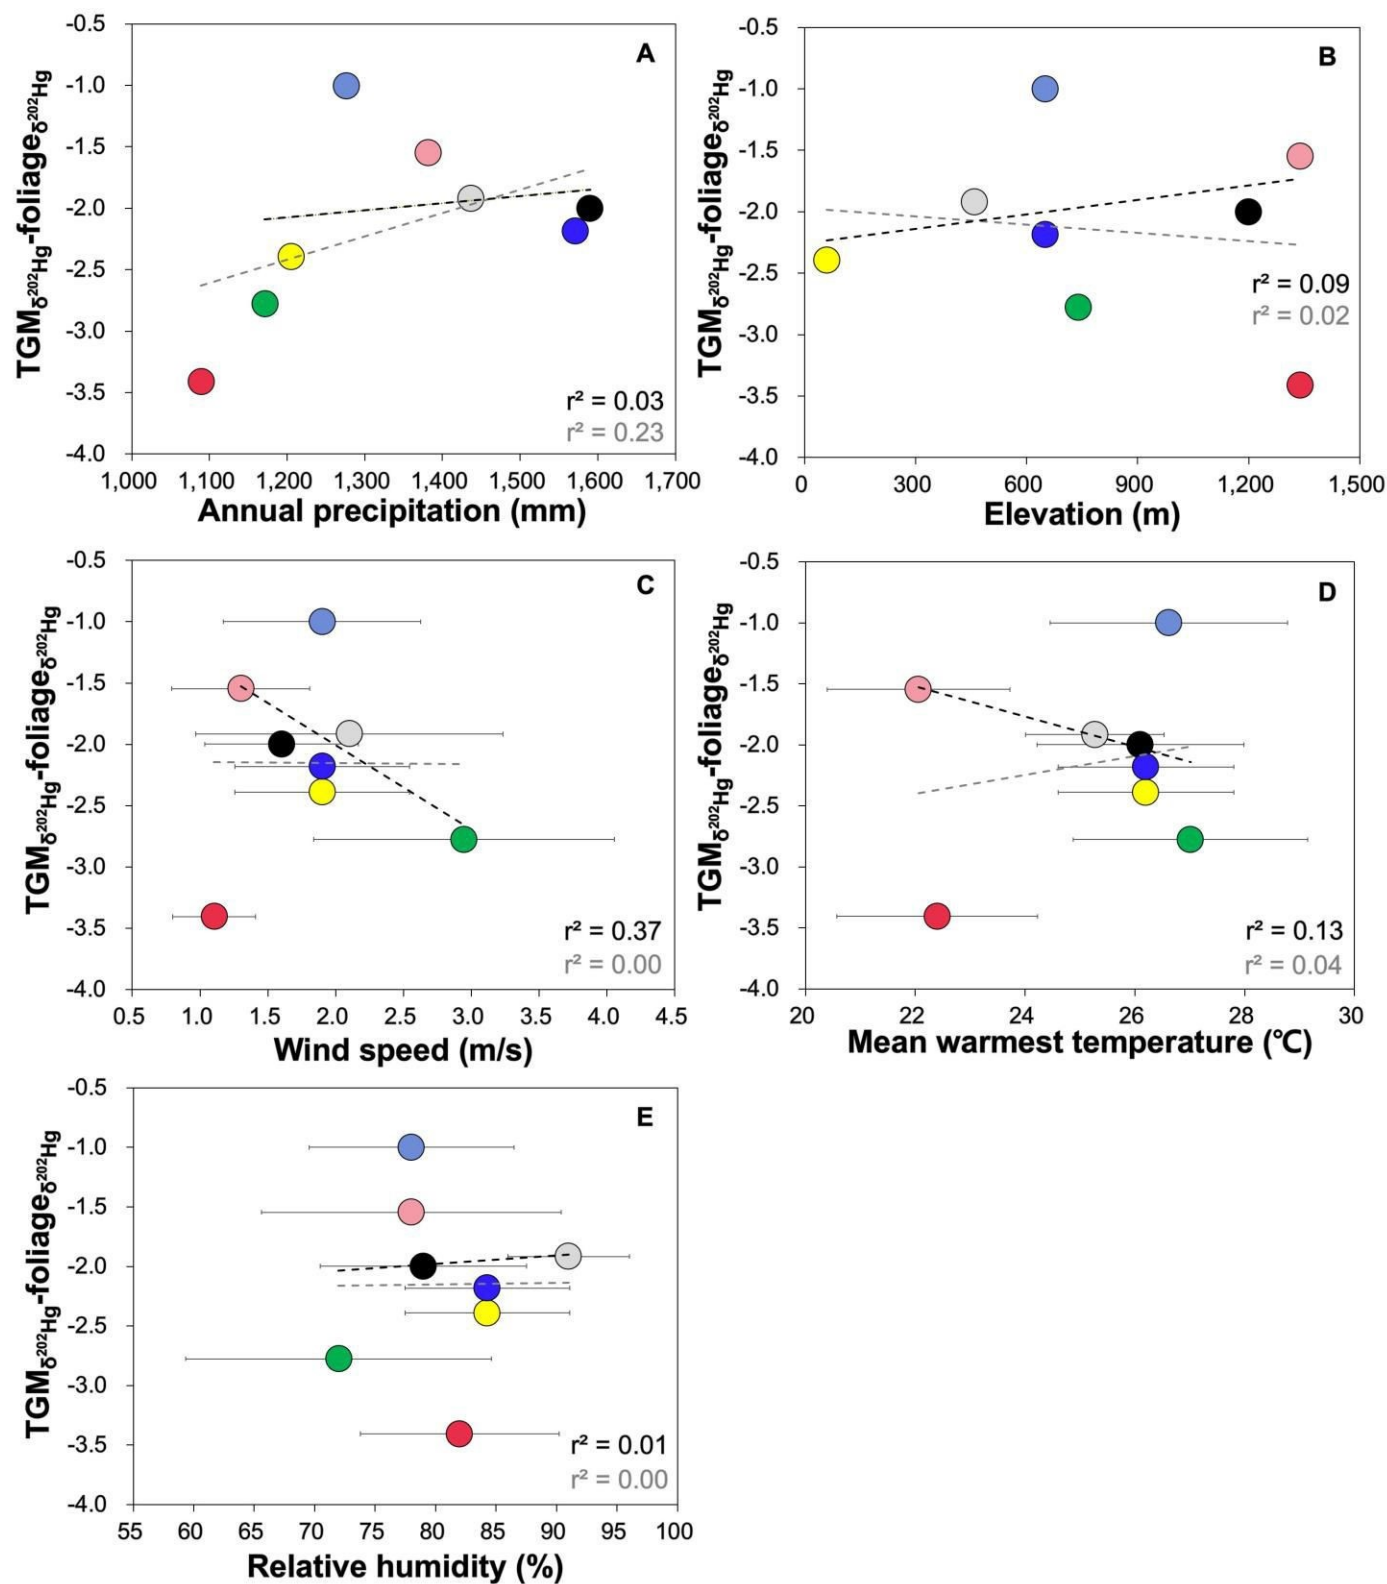

Figures S5

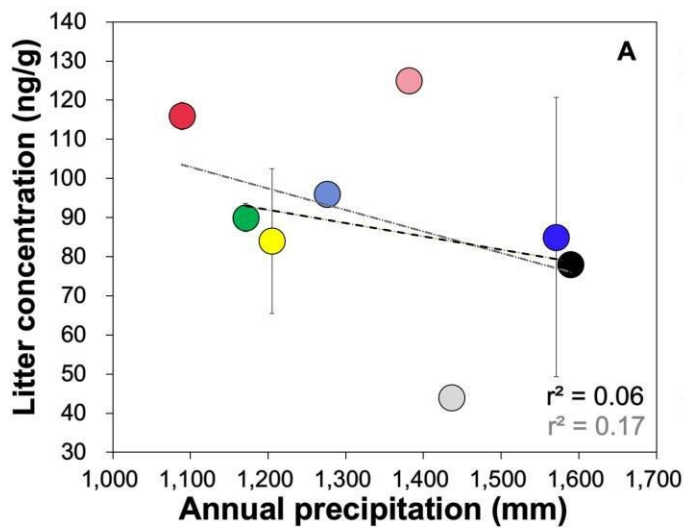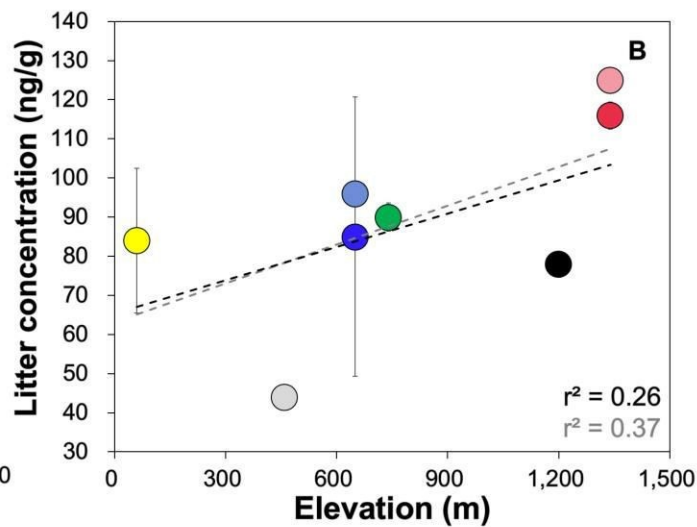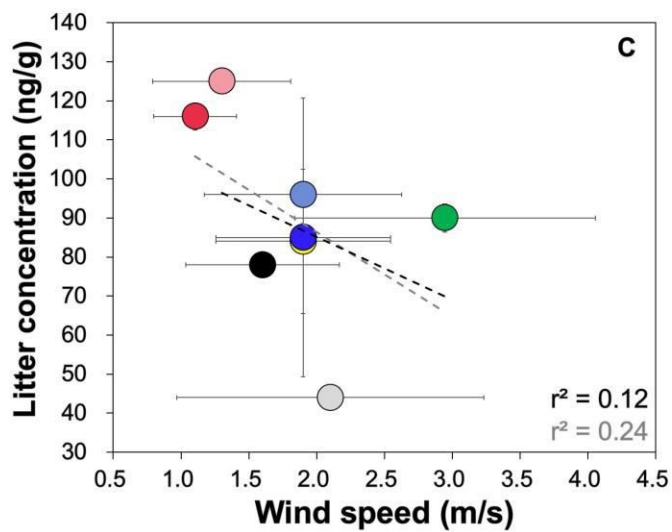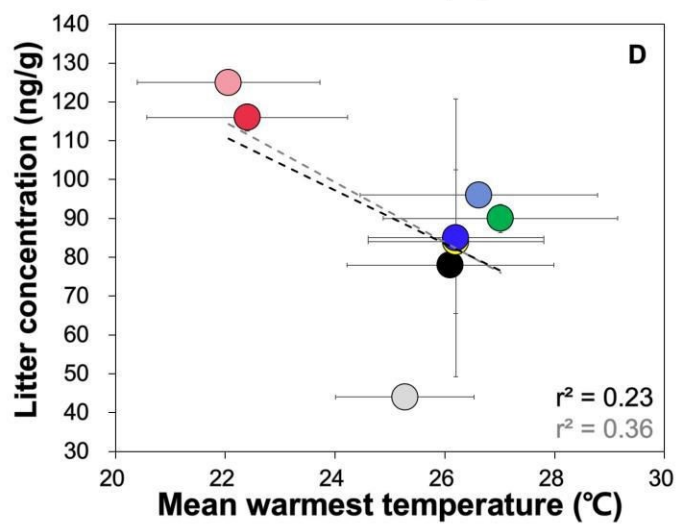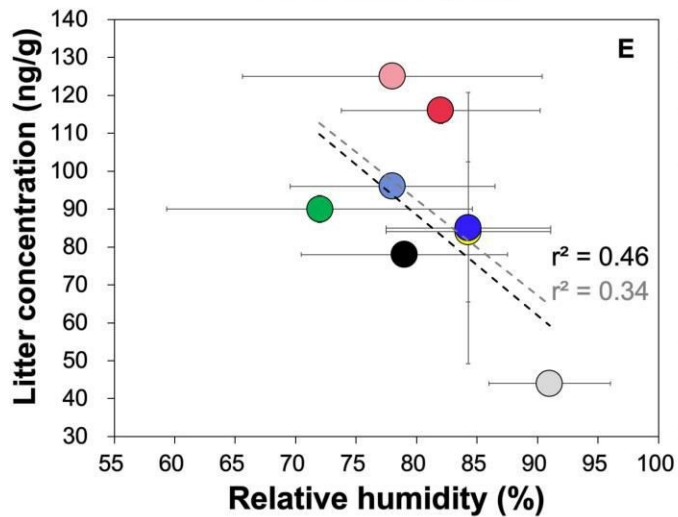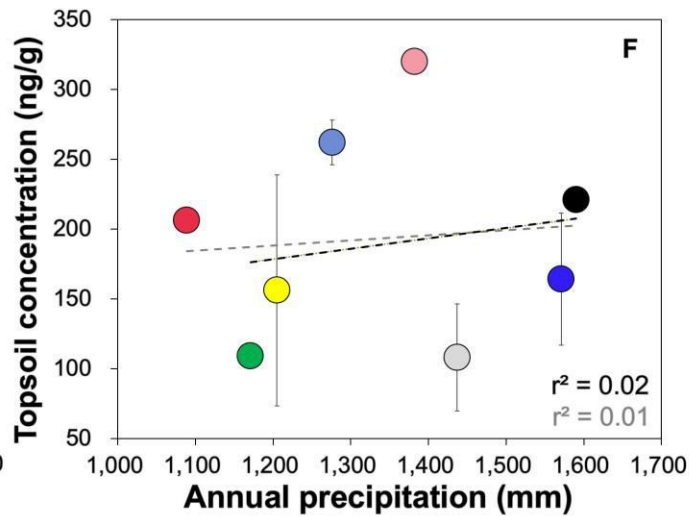

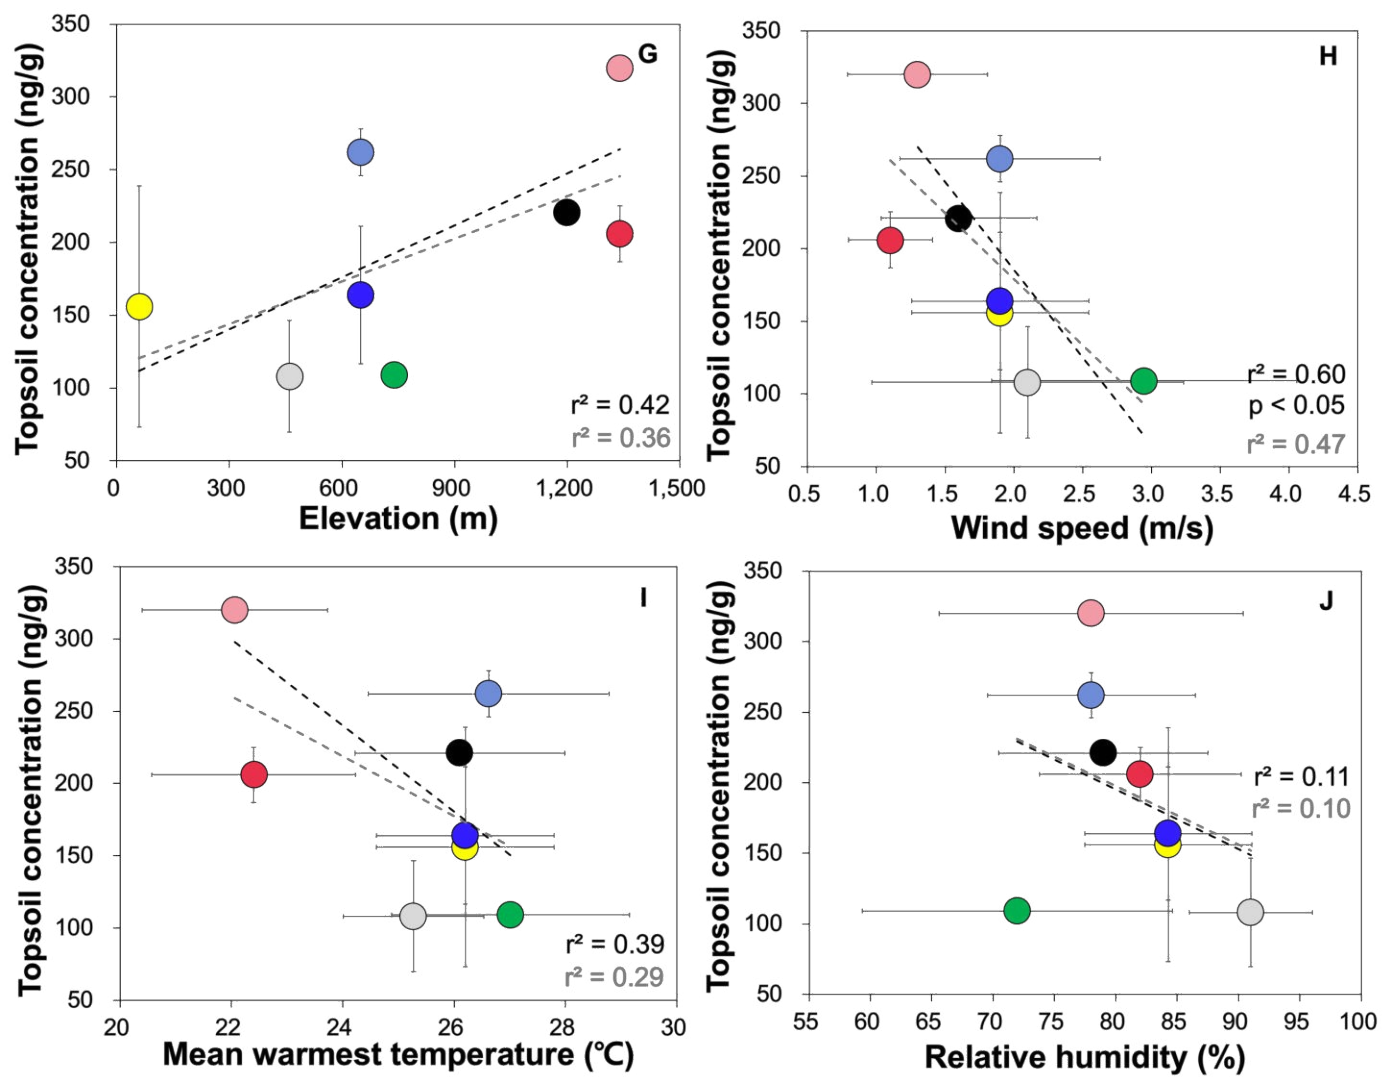

Figure S6

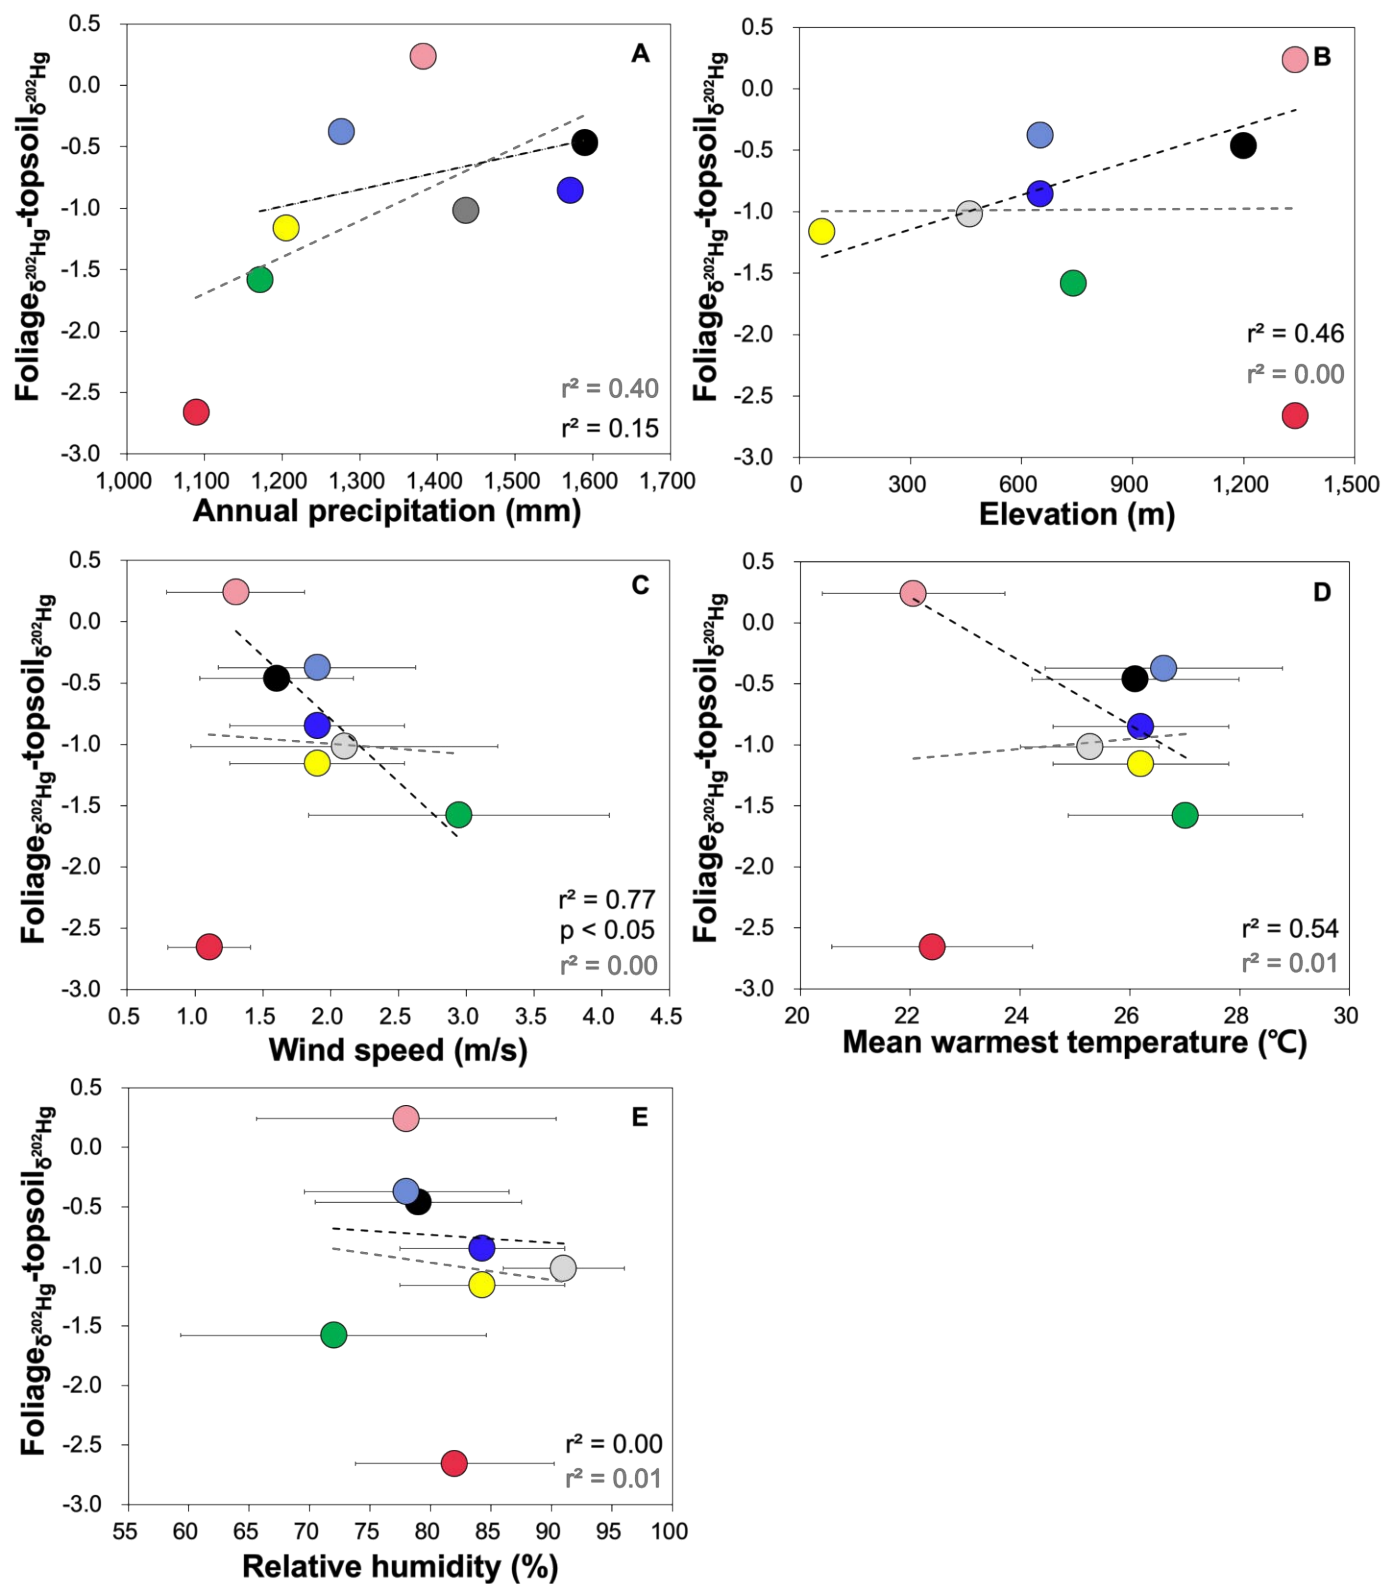

Figure S7

Supplement: d3em00454f1.pdf [file d3em00454f1.pdf]
